# Supplementary material for: Brain hothubs and dark functional networks: correlation analysis between amplitude and connectivity for Broca’s aphasia
Source: PeerJ journal article supplement (doi:10.7717/peerj.10057), 2020-10-01

# Catalogue

|           |    |
|-----------|----|
| baby      | 2  |
| bath      | 3  |
| bed       | 4  |
| blossom   | 5  |
| boy       | 6  |
| bread     | 7  |
| butterfly | 8  |
| cabbage   | 9  |
| carpet    | 10 |
| chair     | 11 |
| child     | 12 |
| doctor    | 13 |
| eagle     | 14 |
| earth     | 15 |
| foot      | 16 |
| fruit     | 17 |
| girl      | 18 |
| hammer    | 19 |
| hand      | 20 |
| house     | 21 |
| king      | 22 |
| lamp      | 23 |
| lion      | 24 |
| man       | 25 |
| moon      | 26 |
| mountain  | 27 |
| needle    | 28 |
| priest    | 29 |
| scissors  | 30 |
| sheep     | 31 |
| sleep     | 32 |
| soldier   | 33 |
| square    | 34 |
| table     | 35 |
| thief     | 36 |
| tobacco   | 37 |
| whistle   | 38 |
| window    | 39 |
| woman     | 40 |
| working   | 41 |

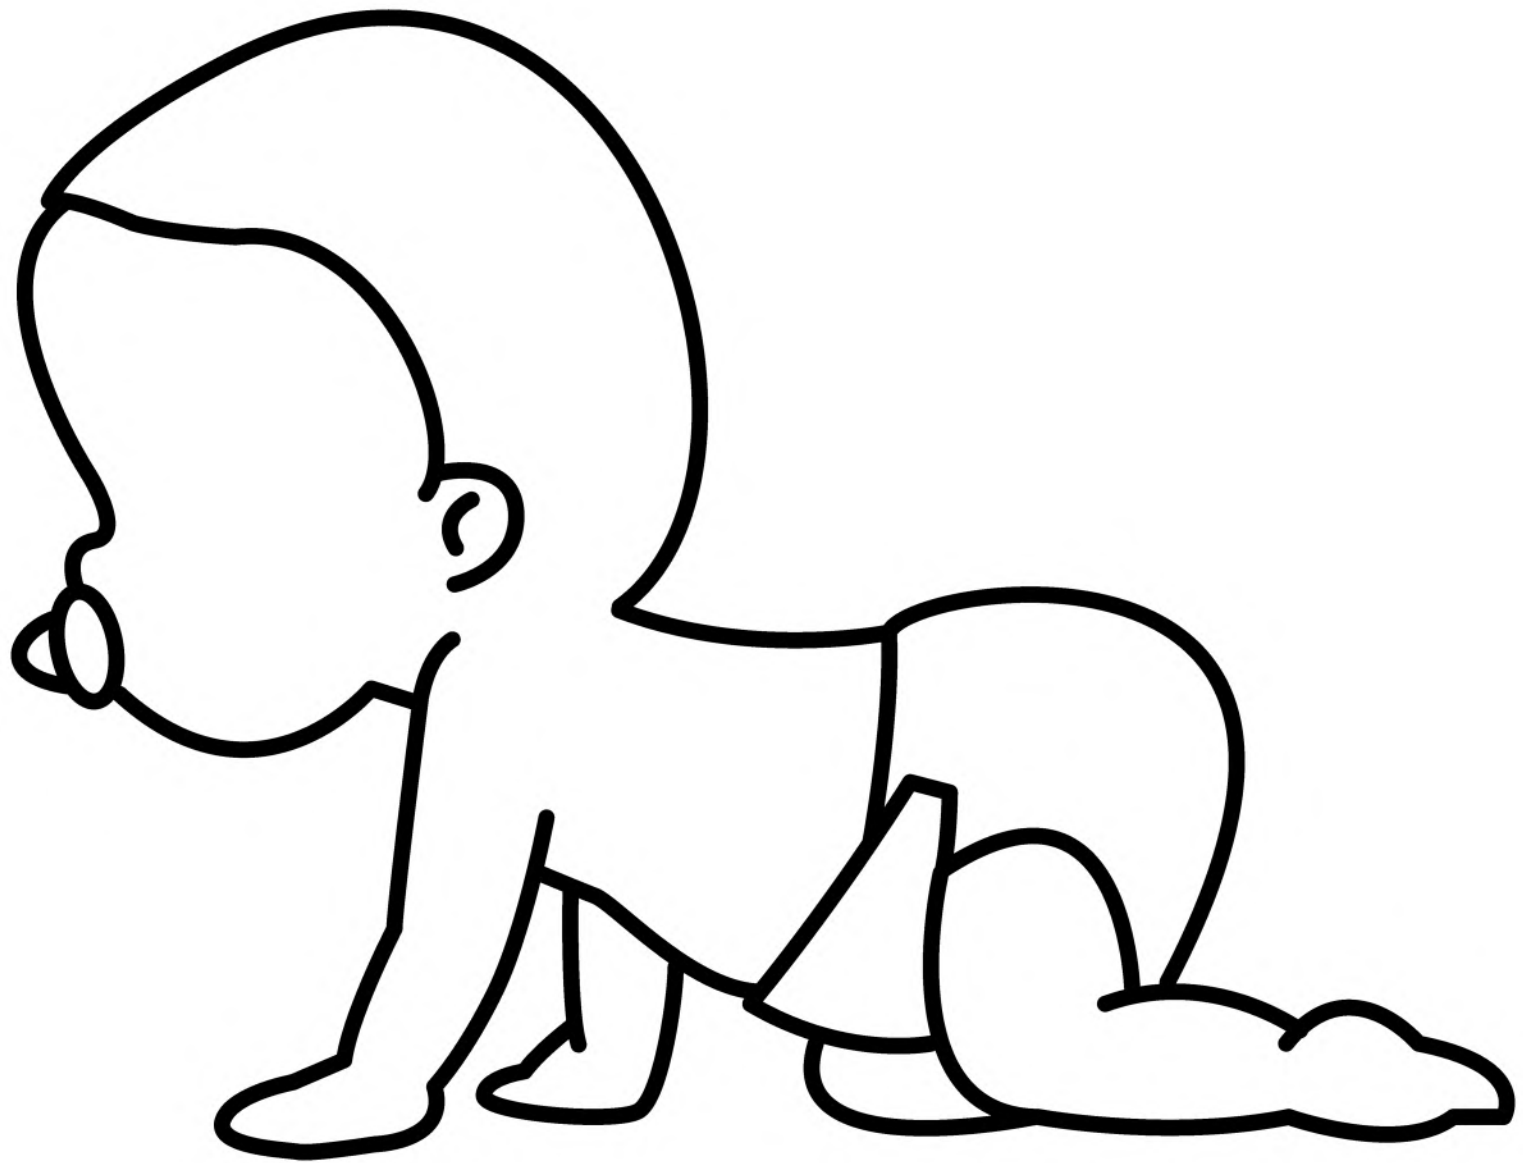

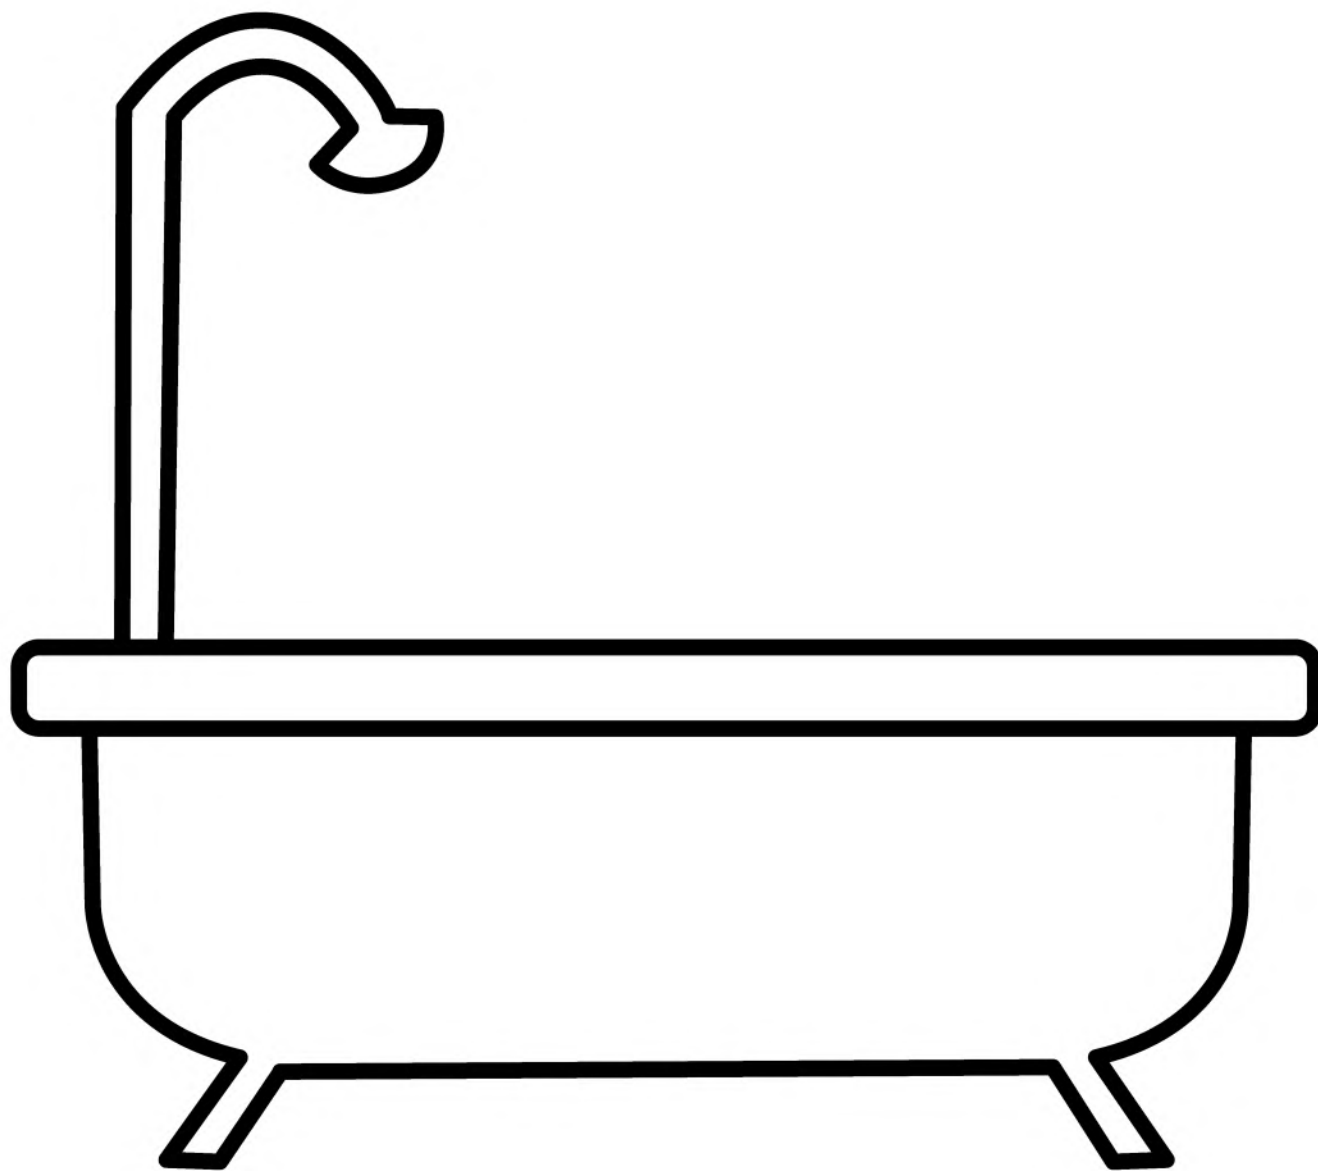

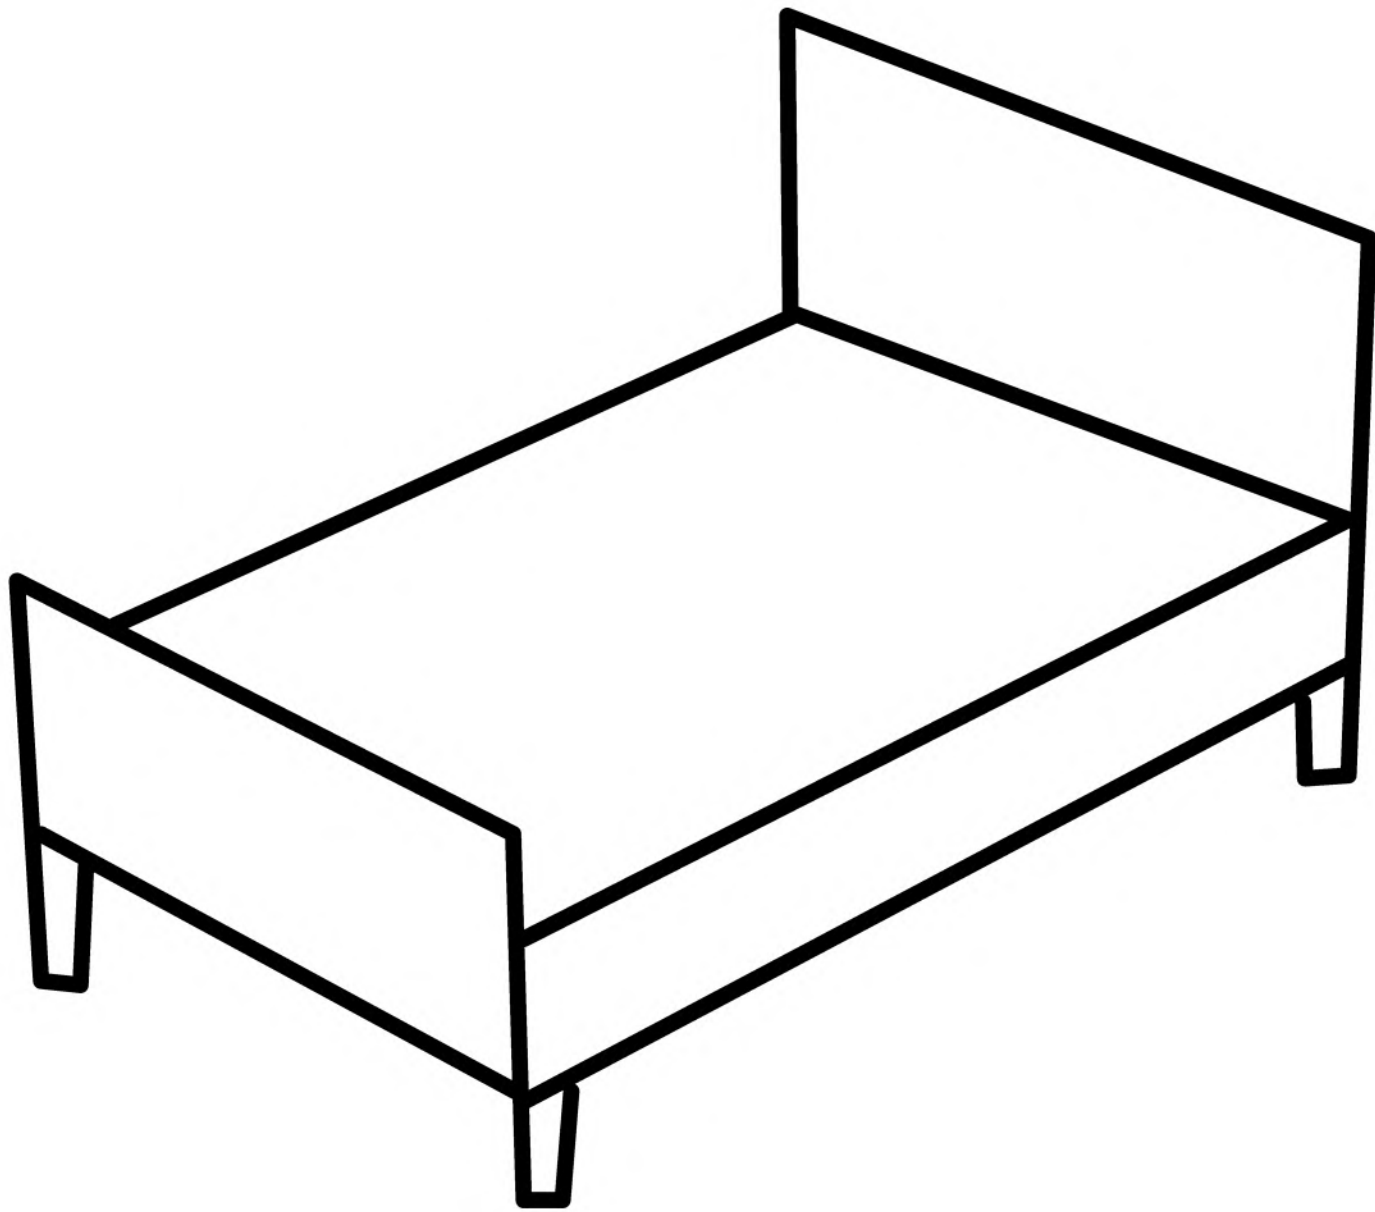

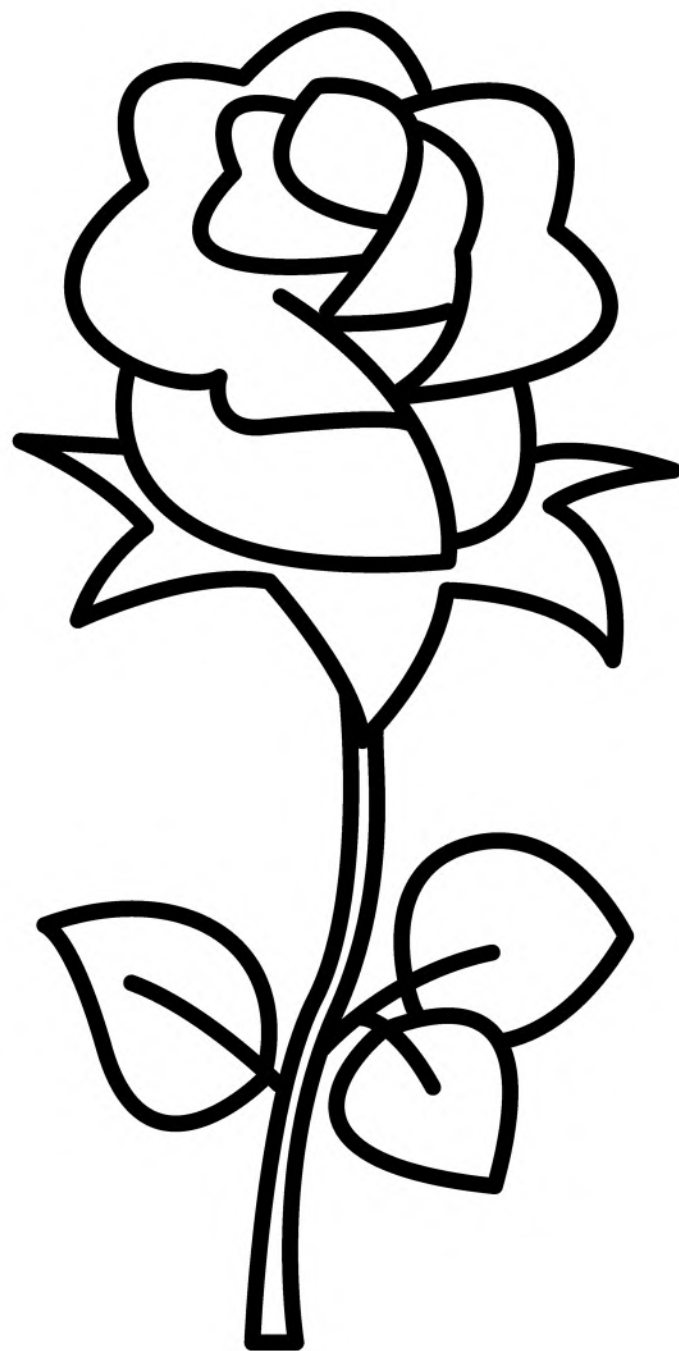

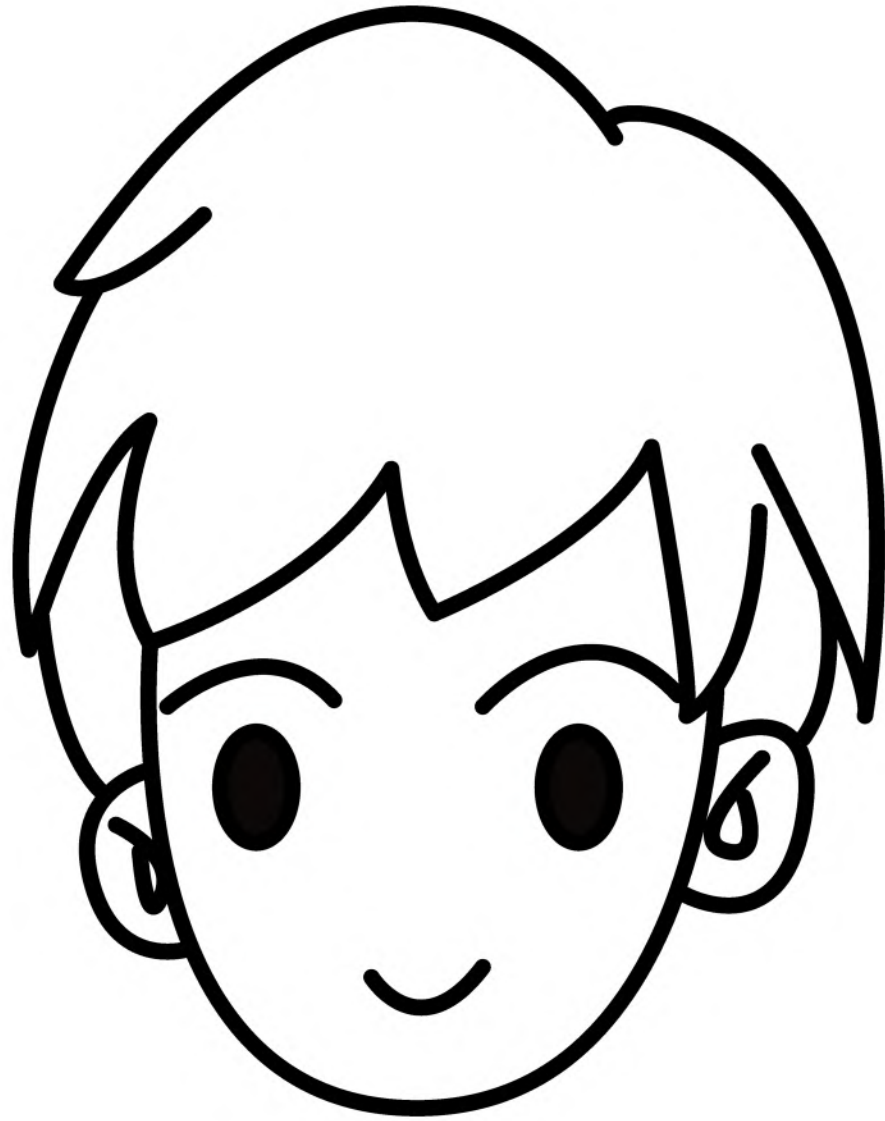

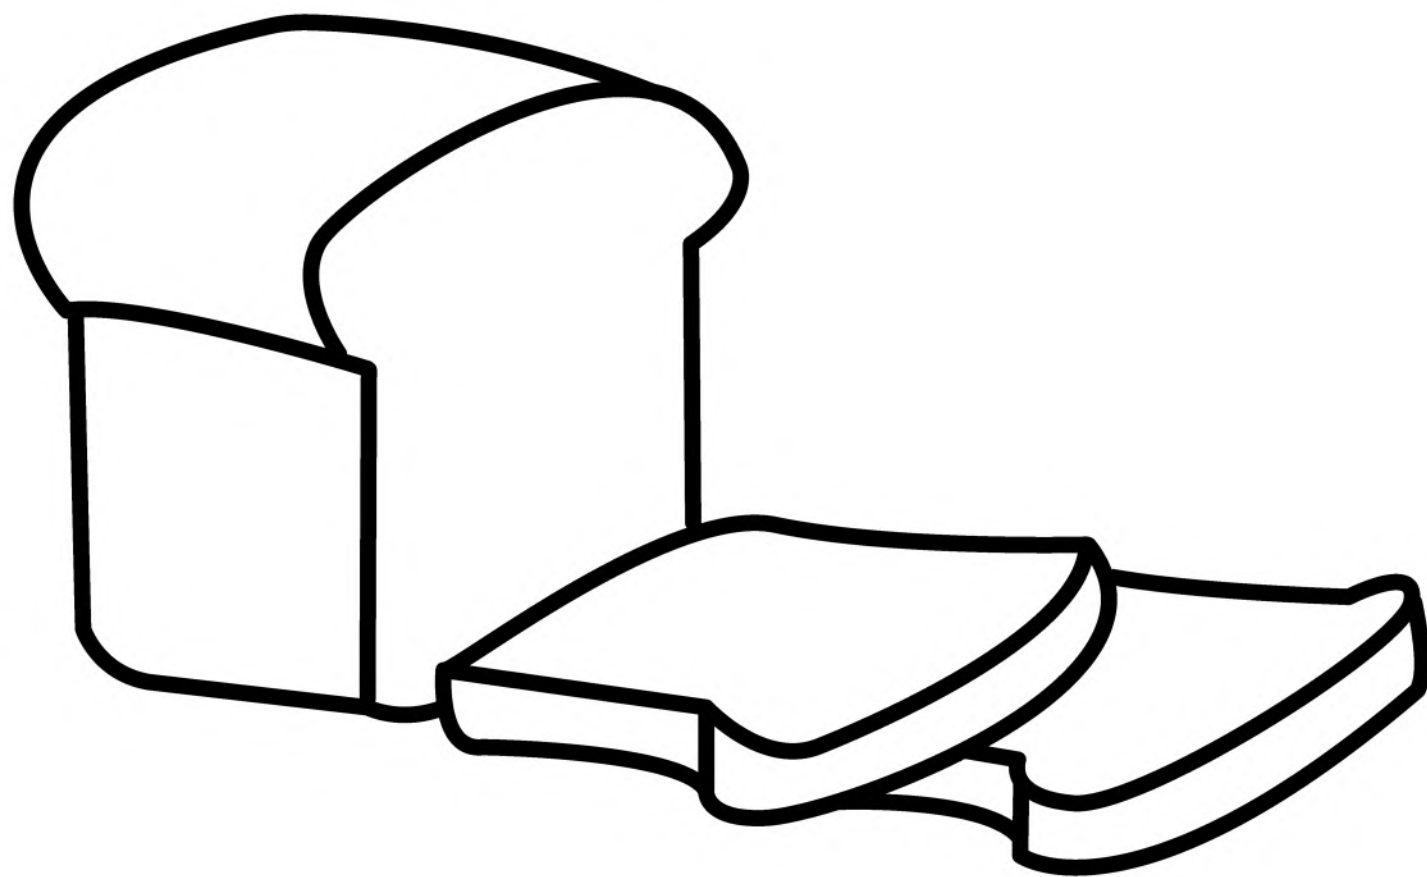

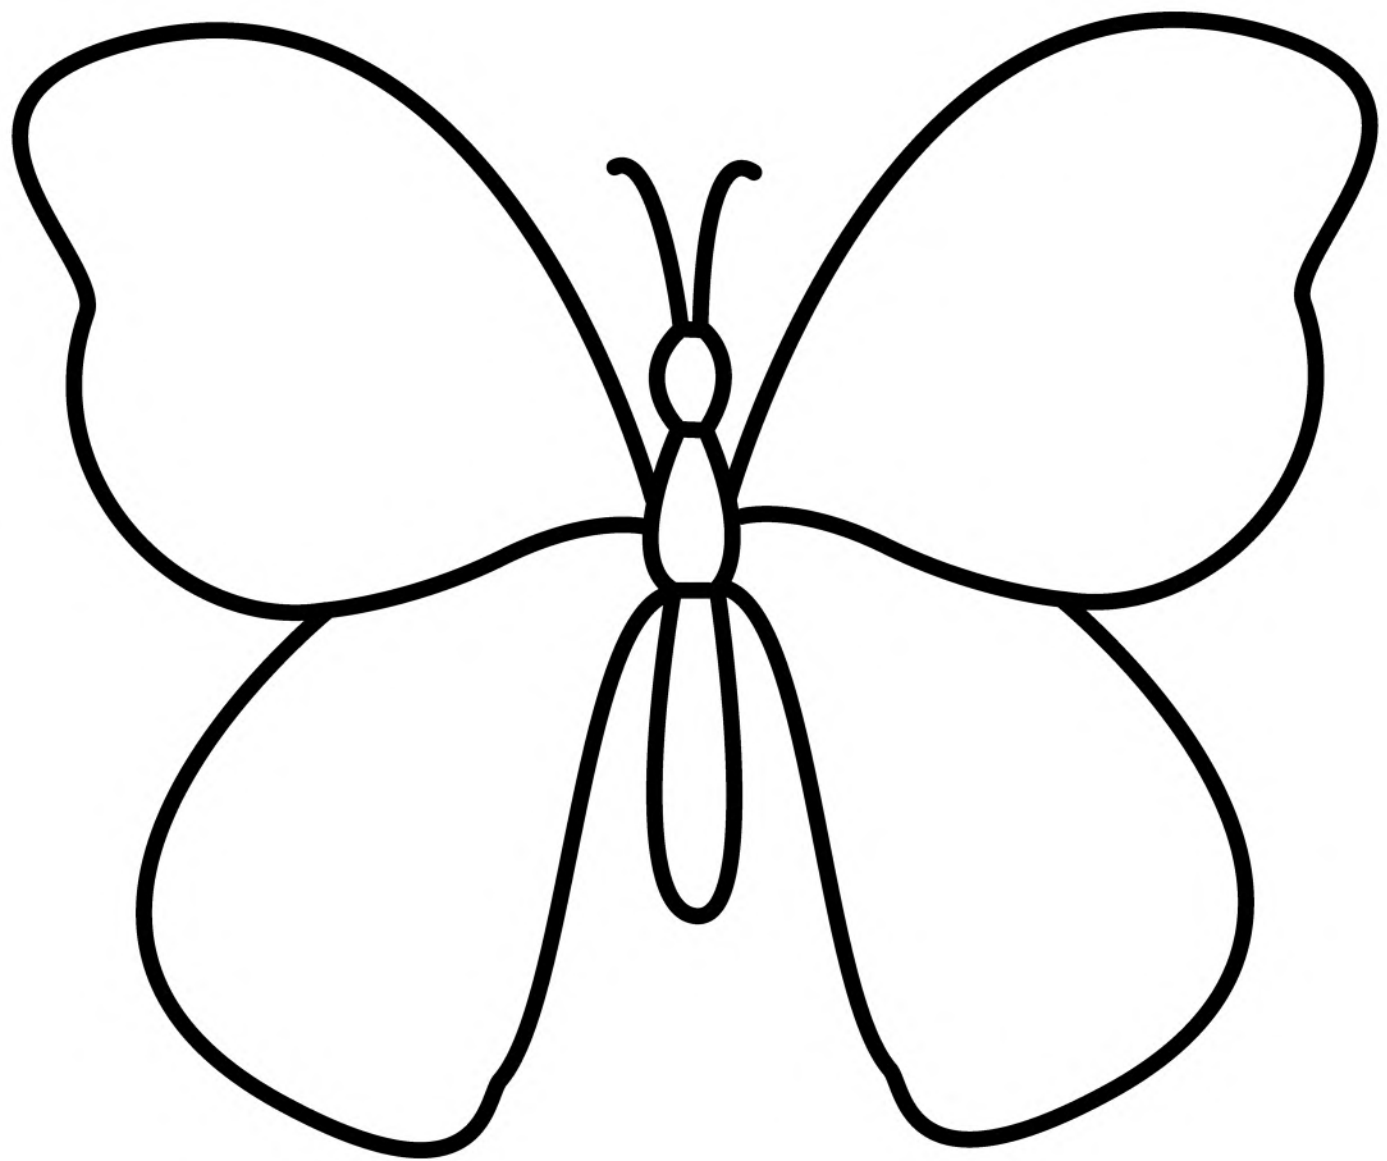



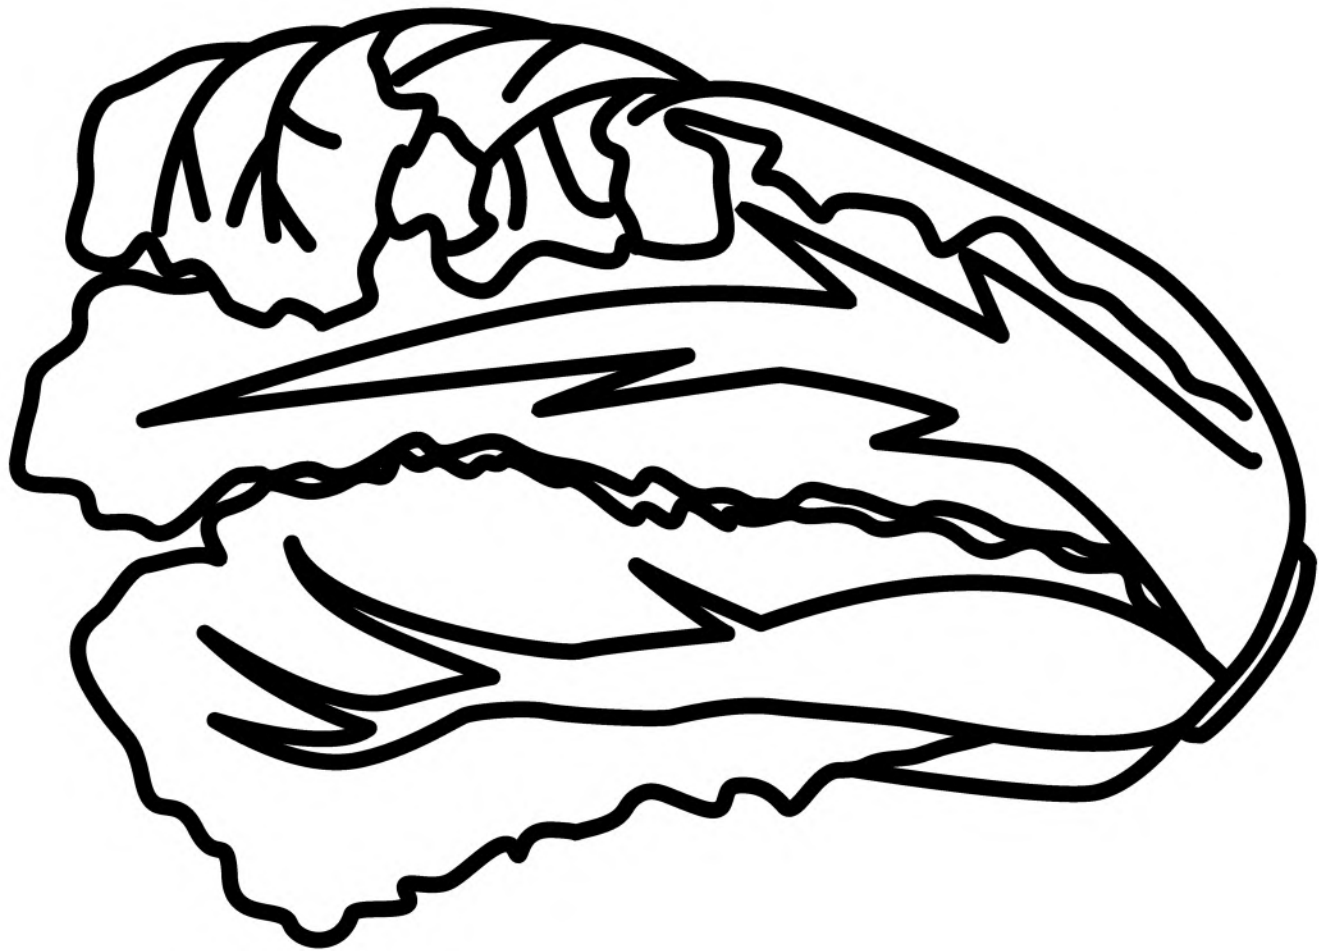

cabbage

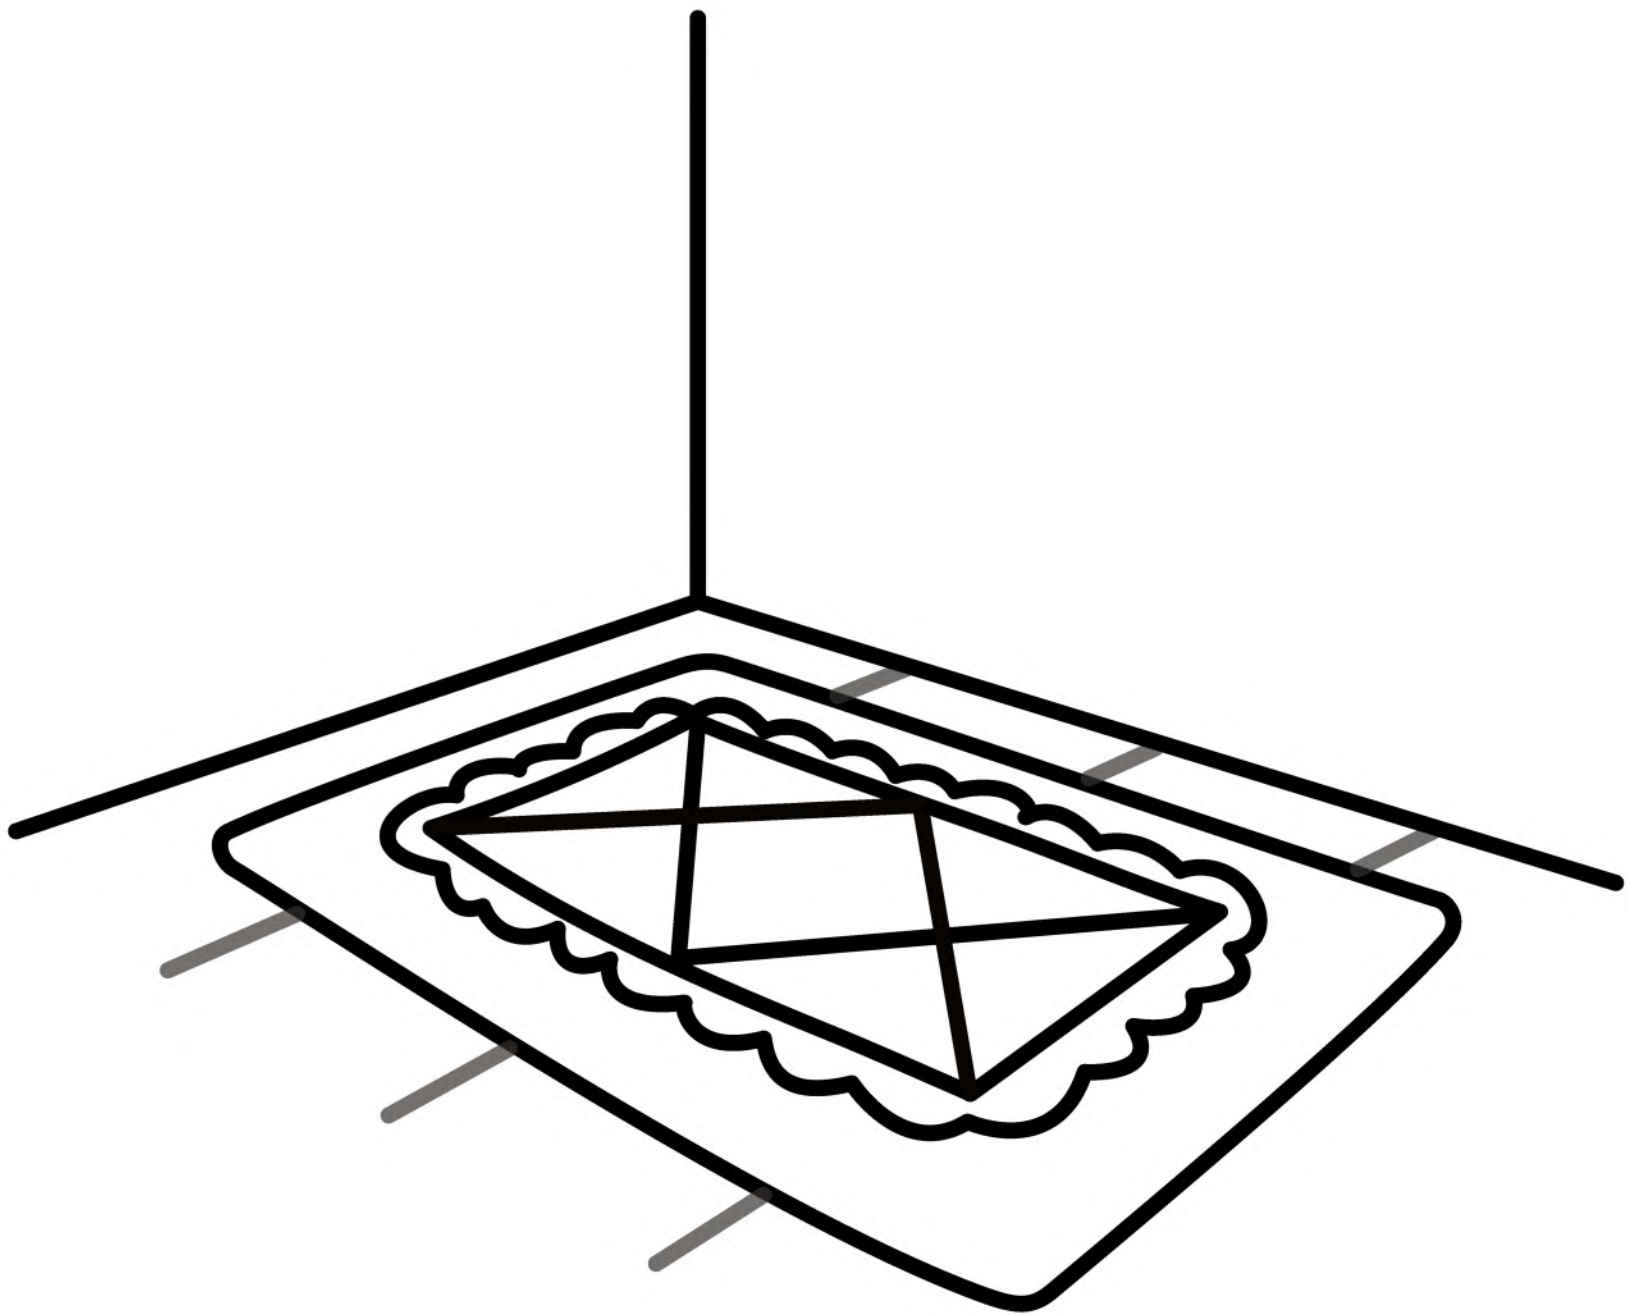

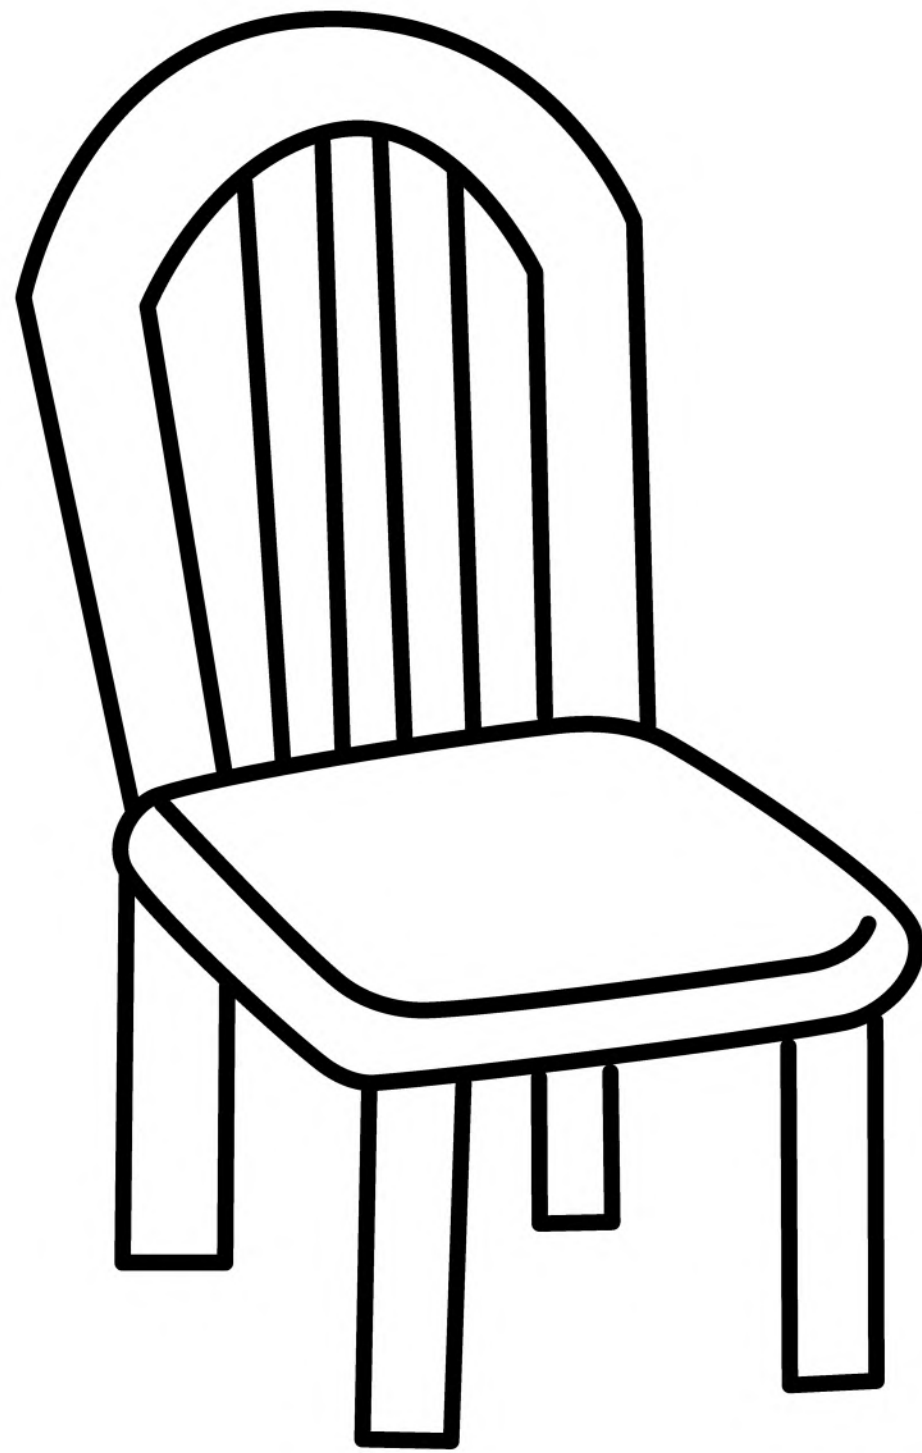

chair

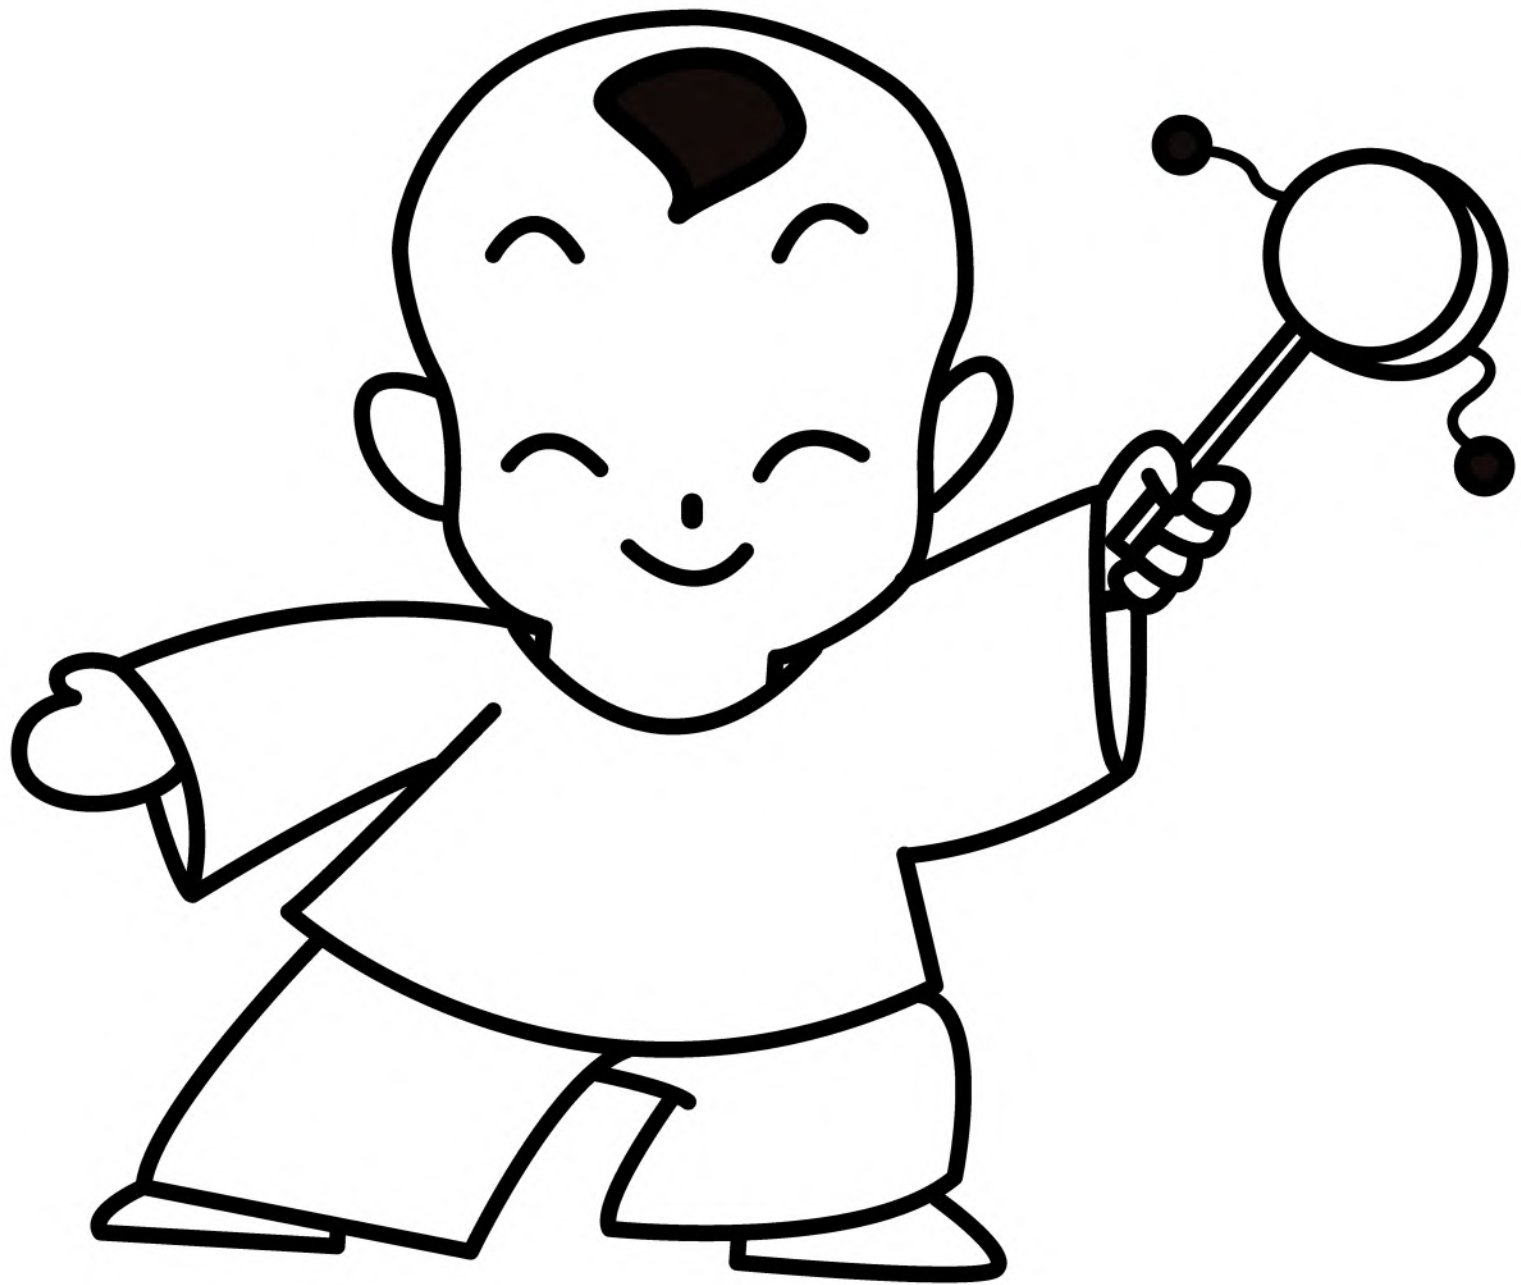

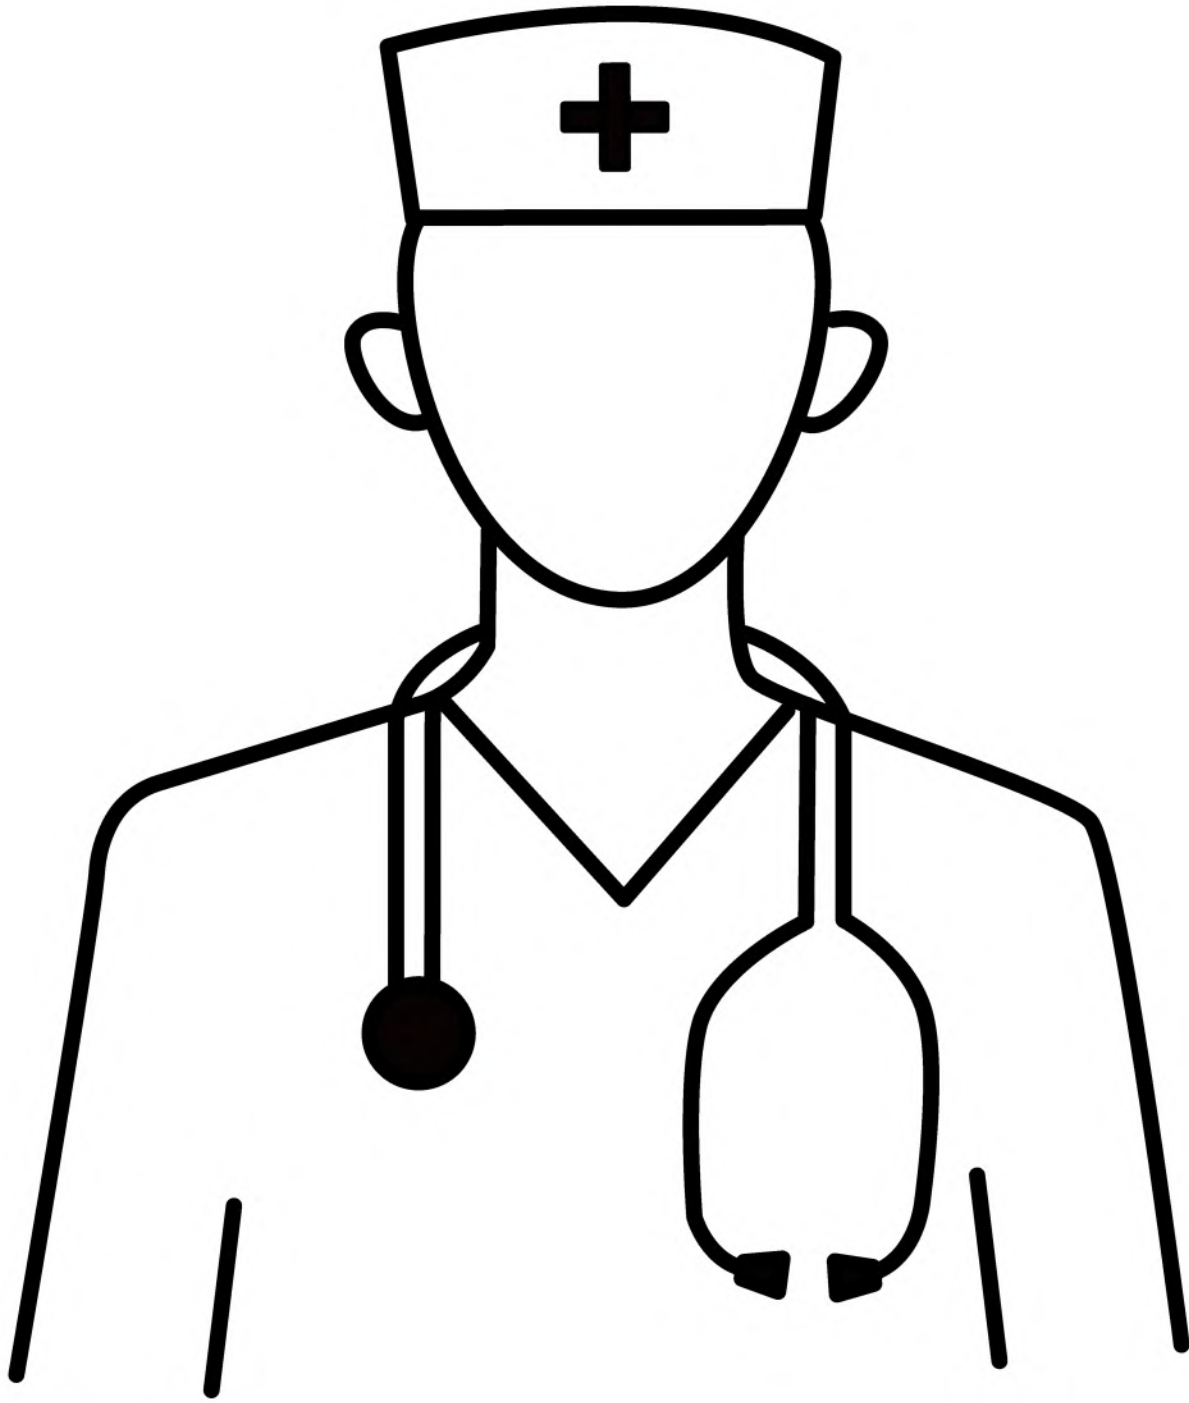

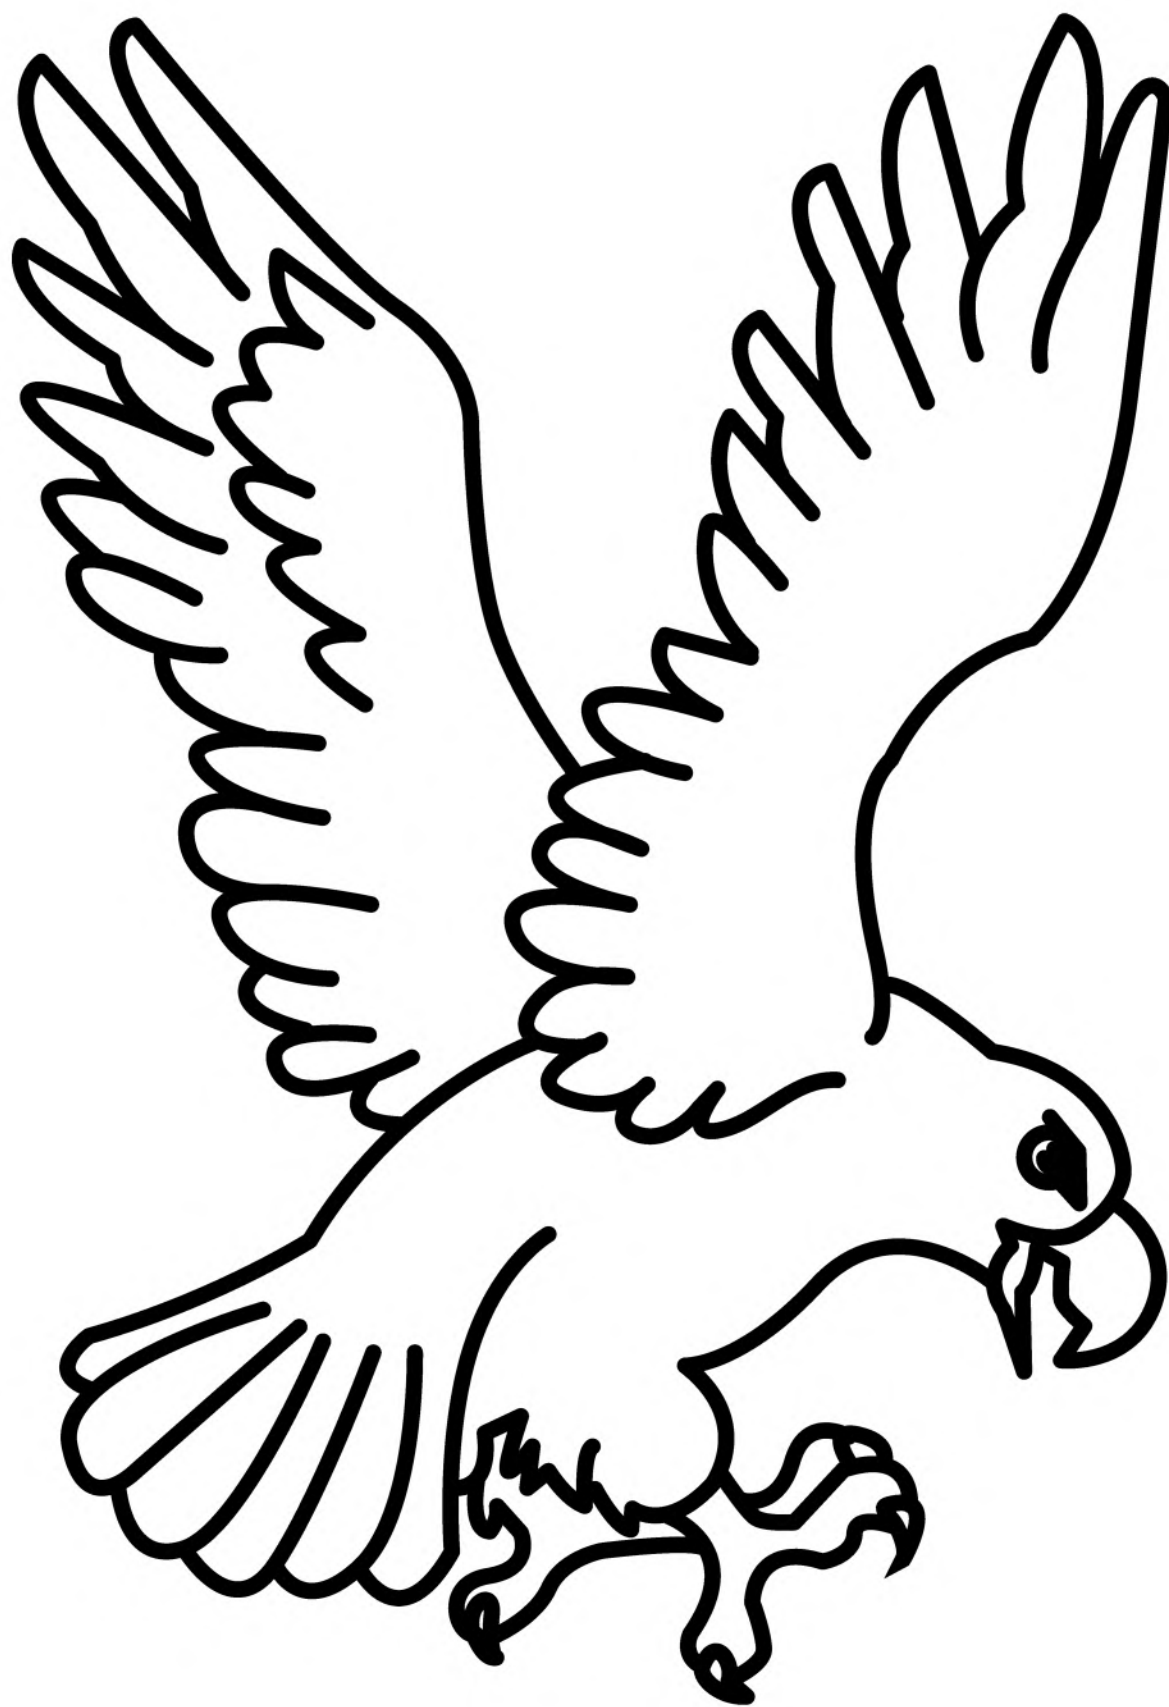

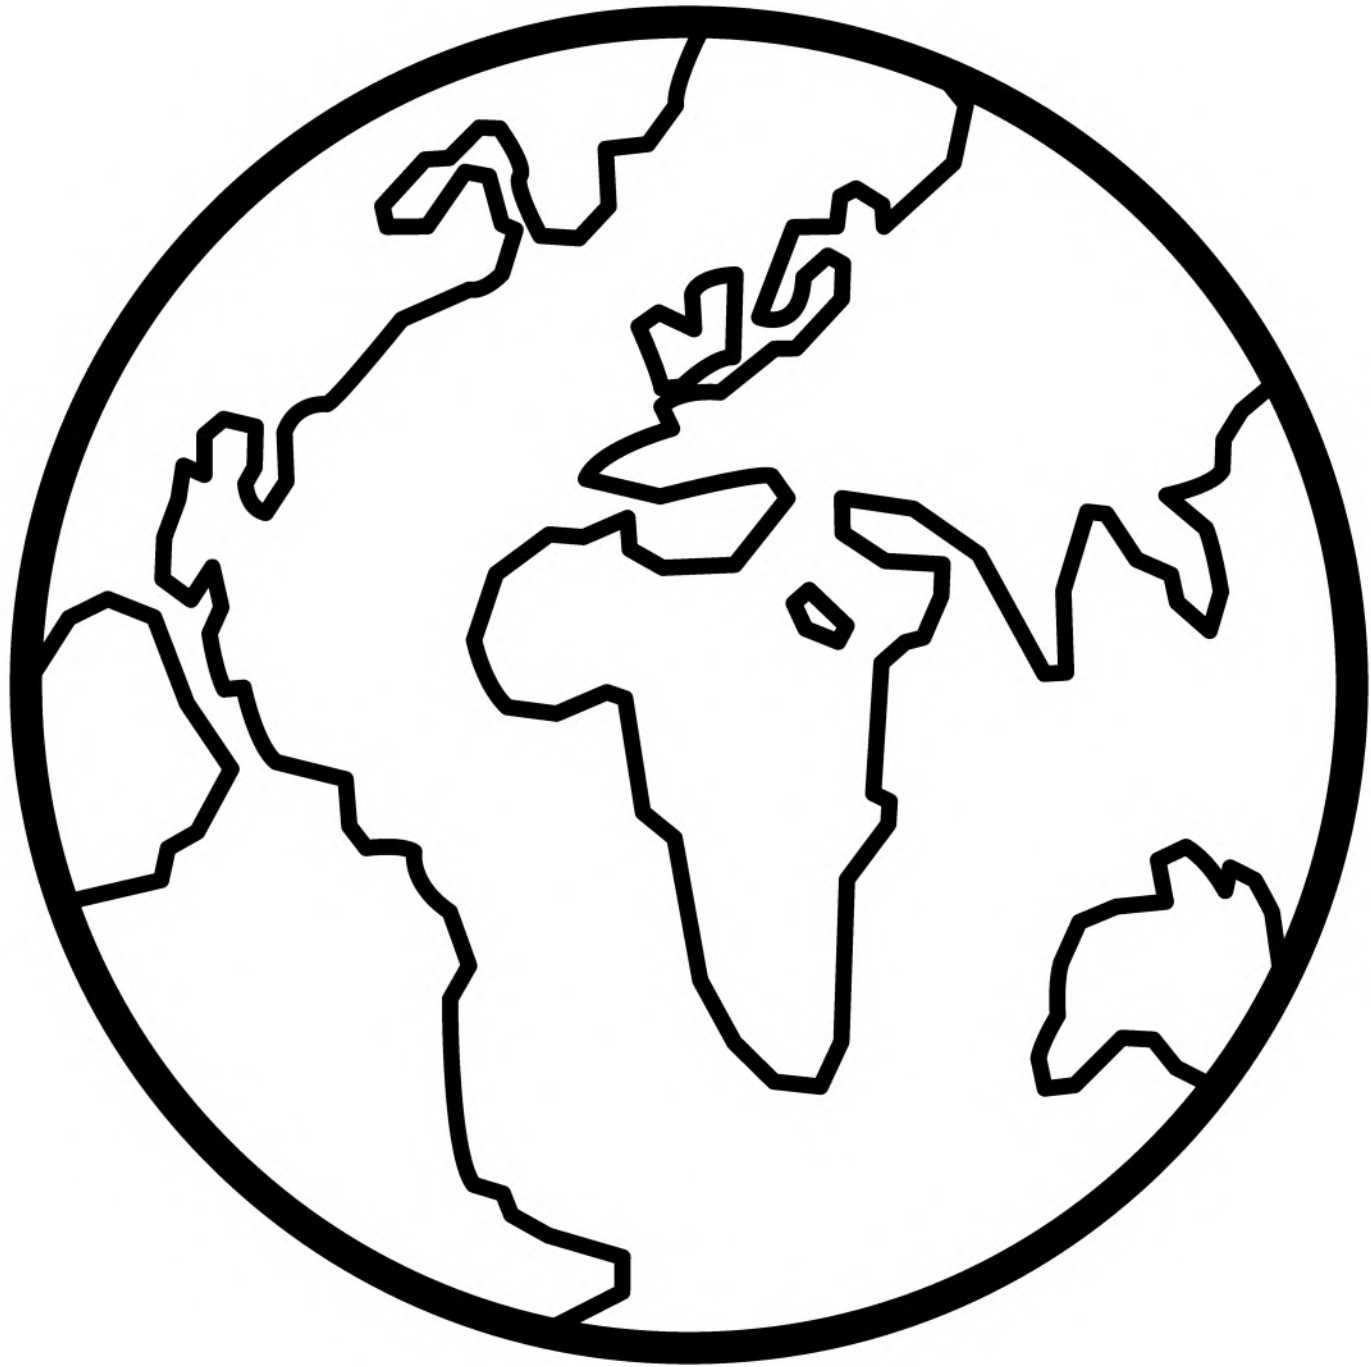

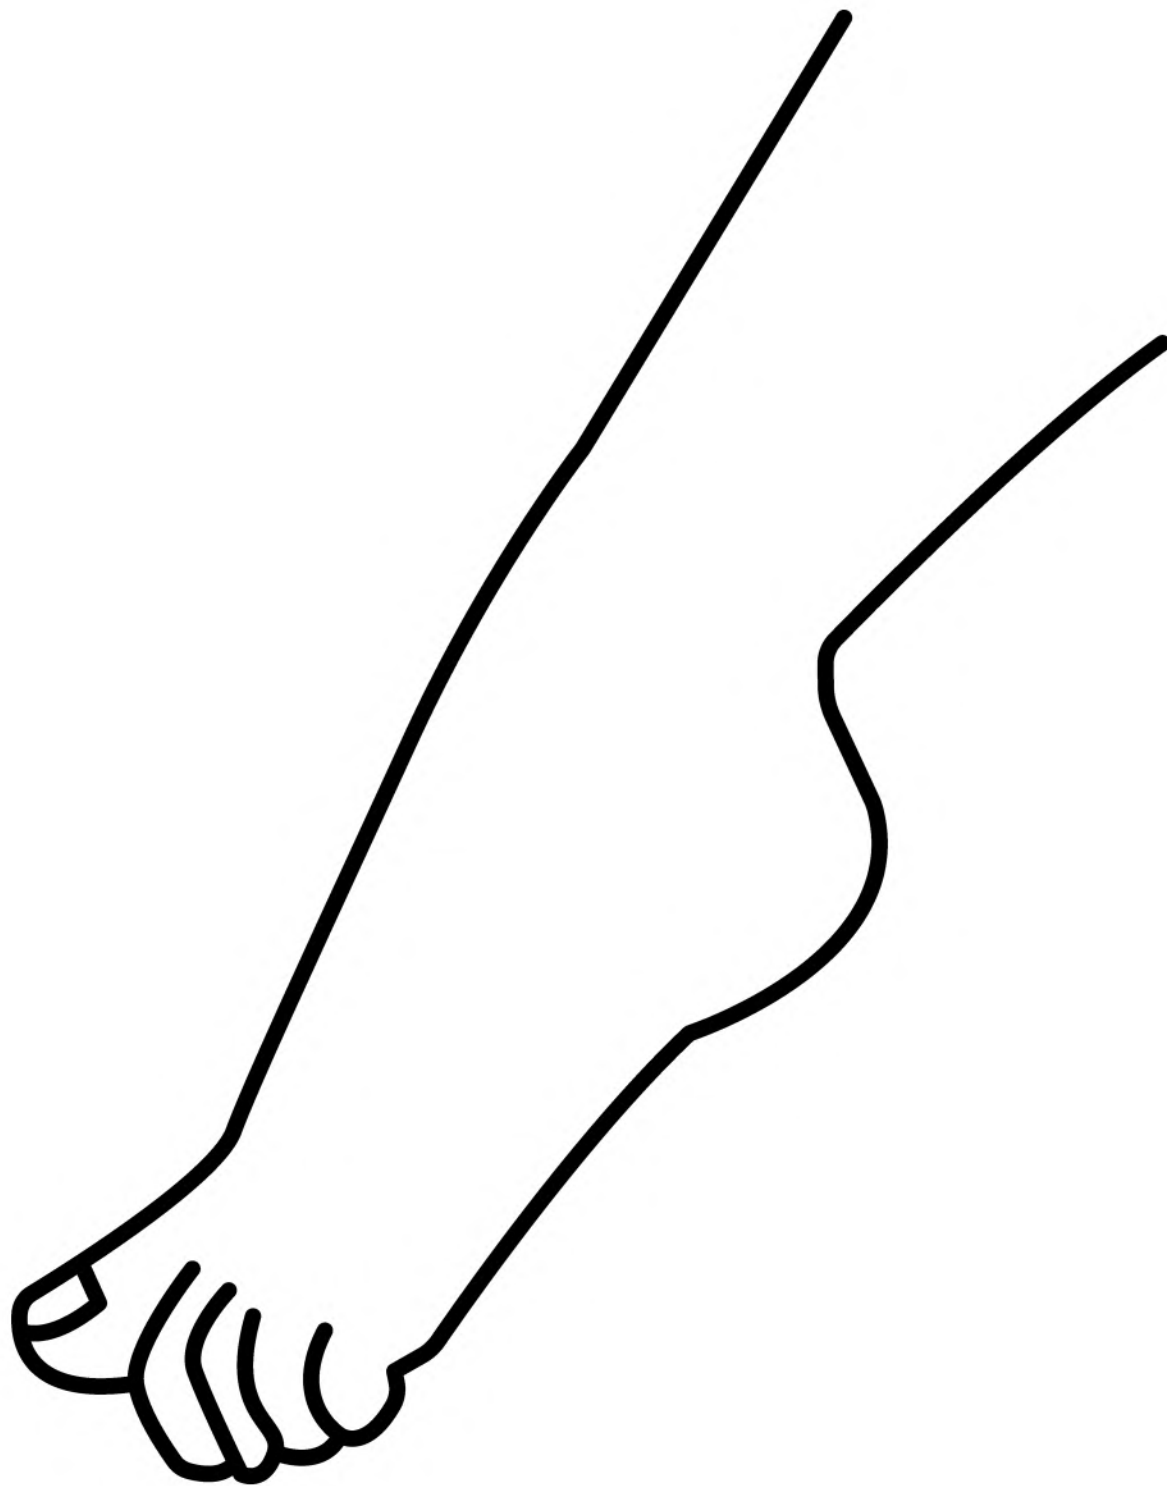



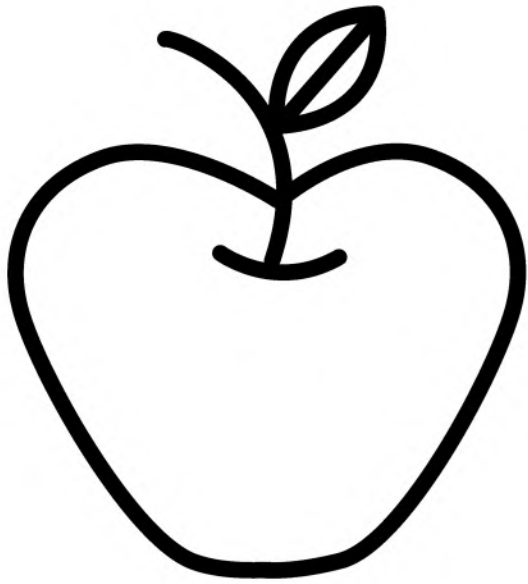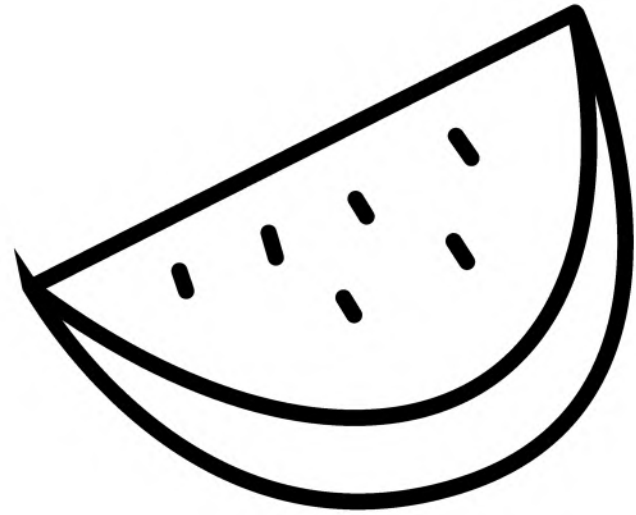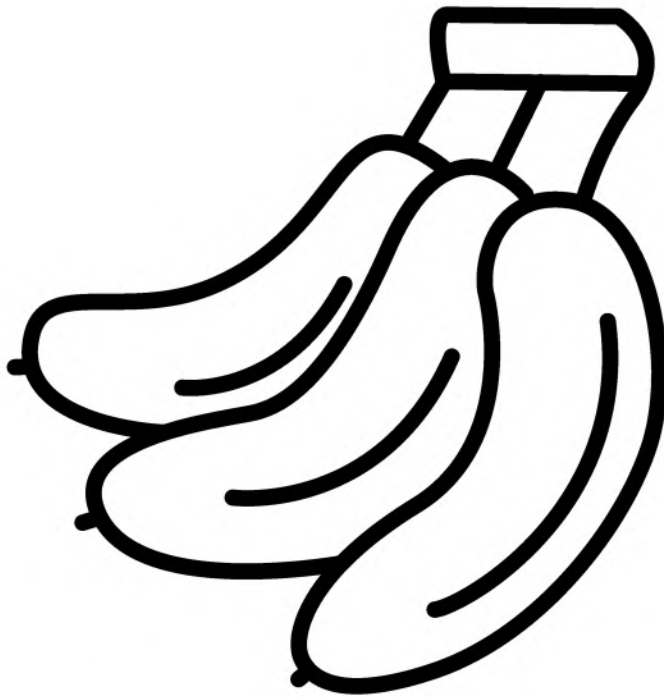

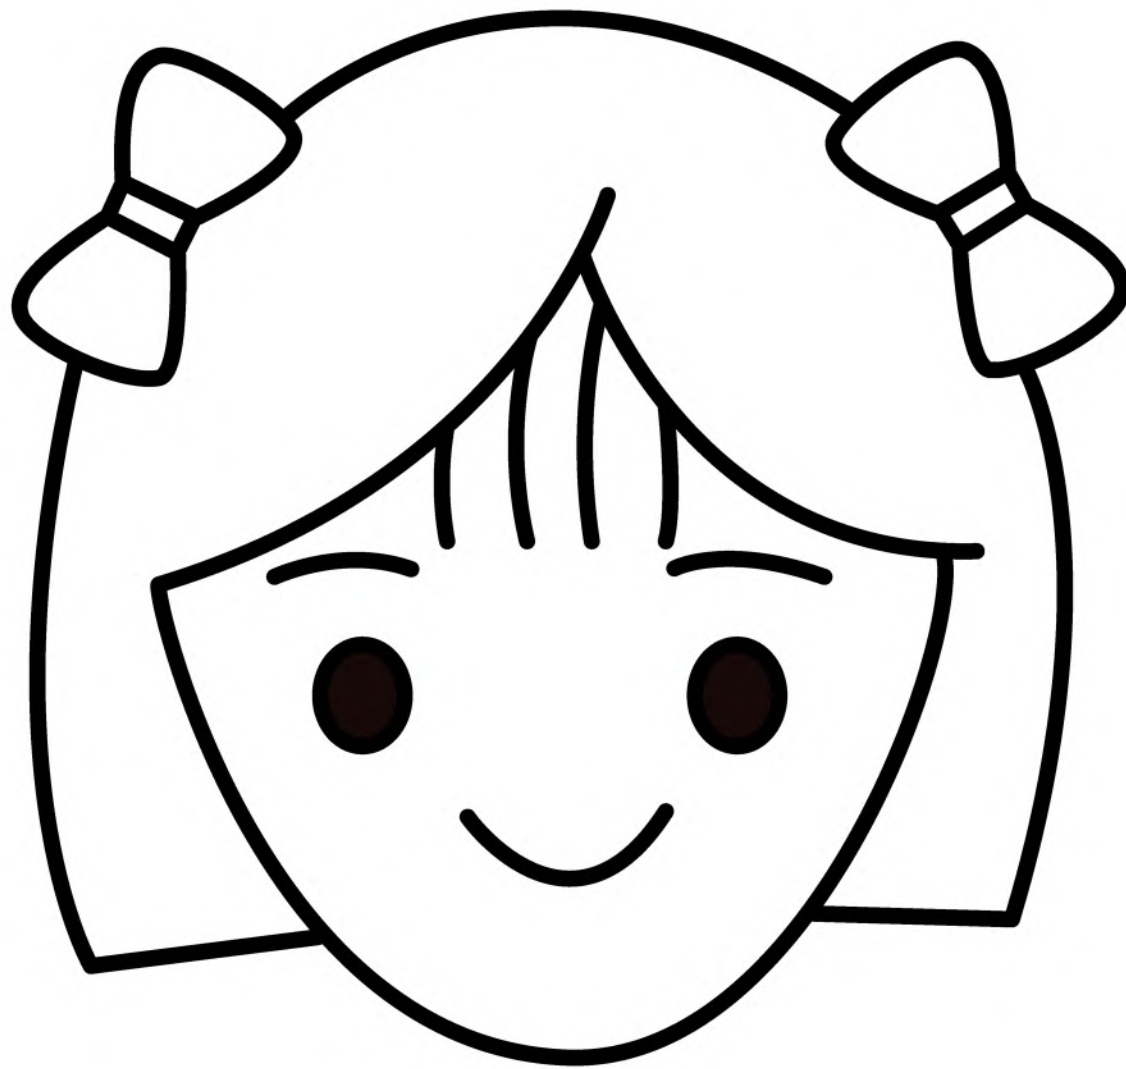

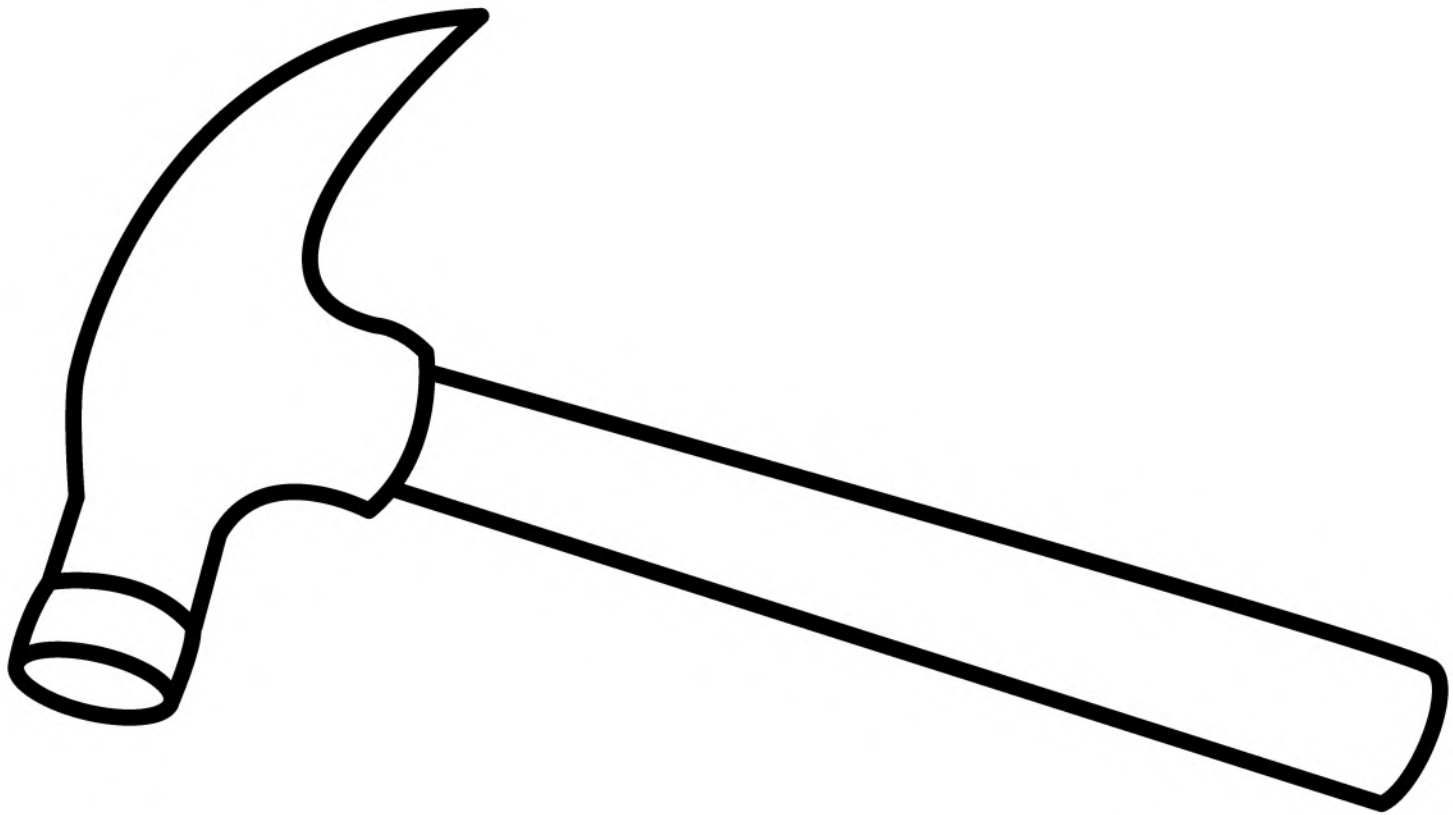

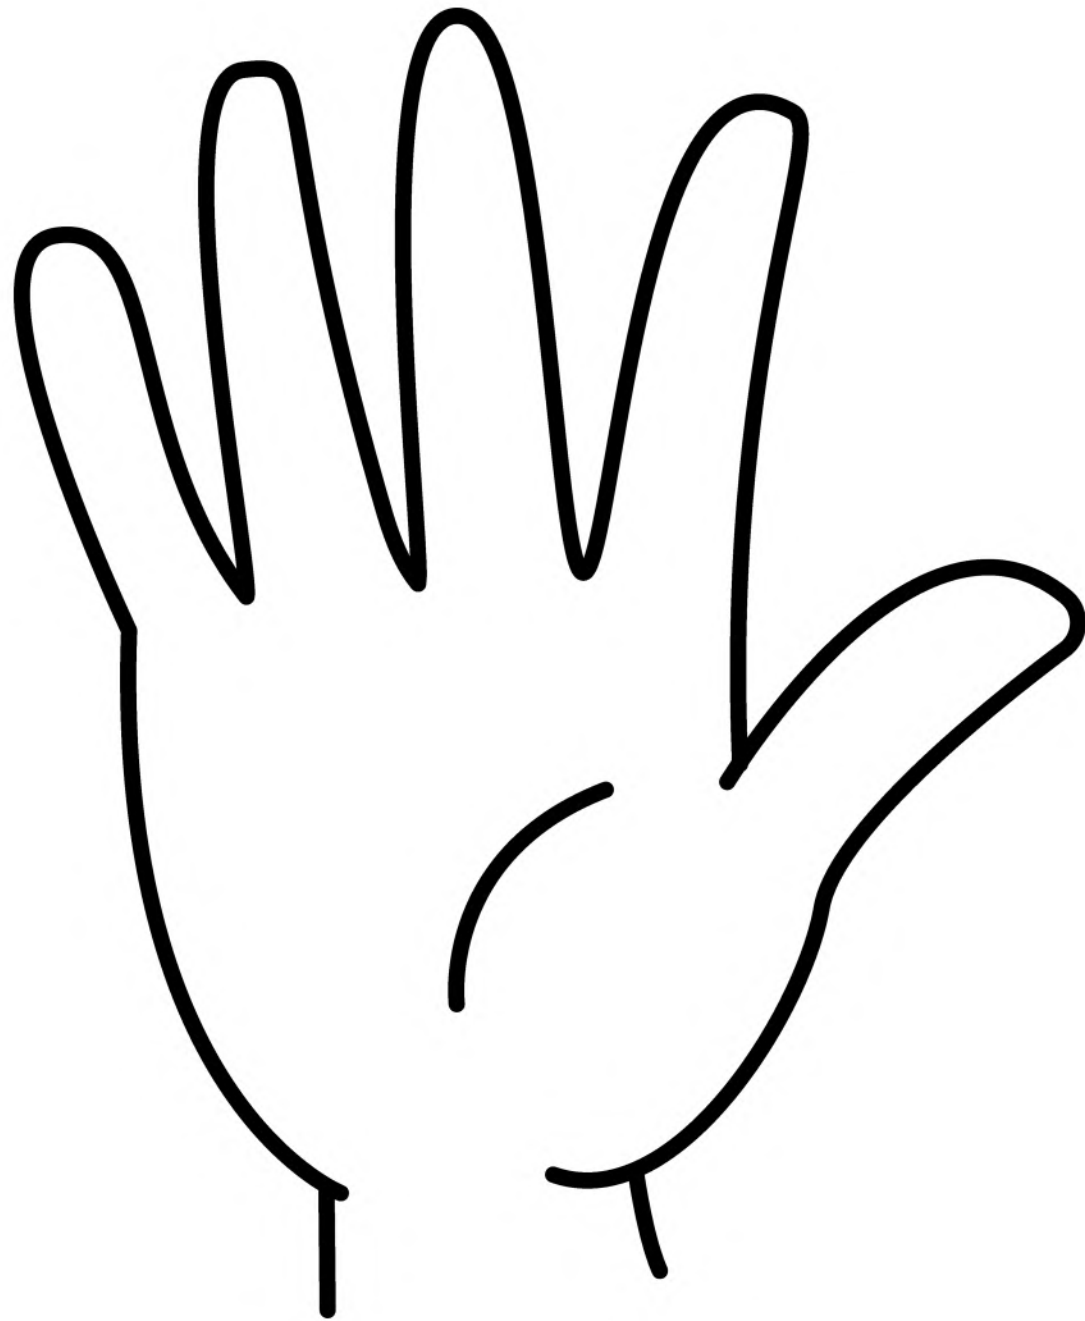

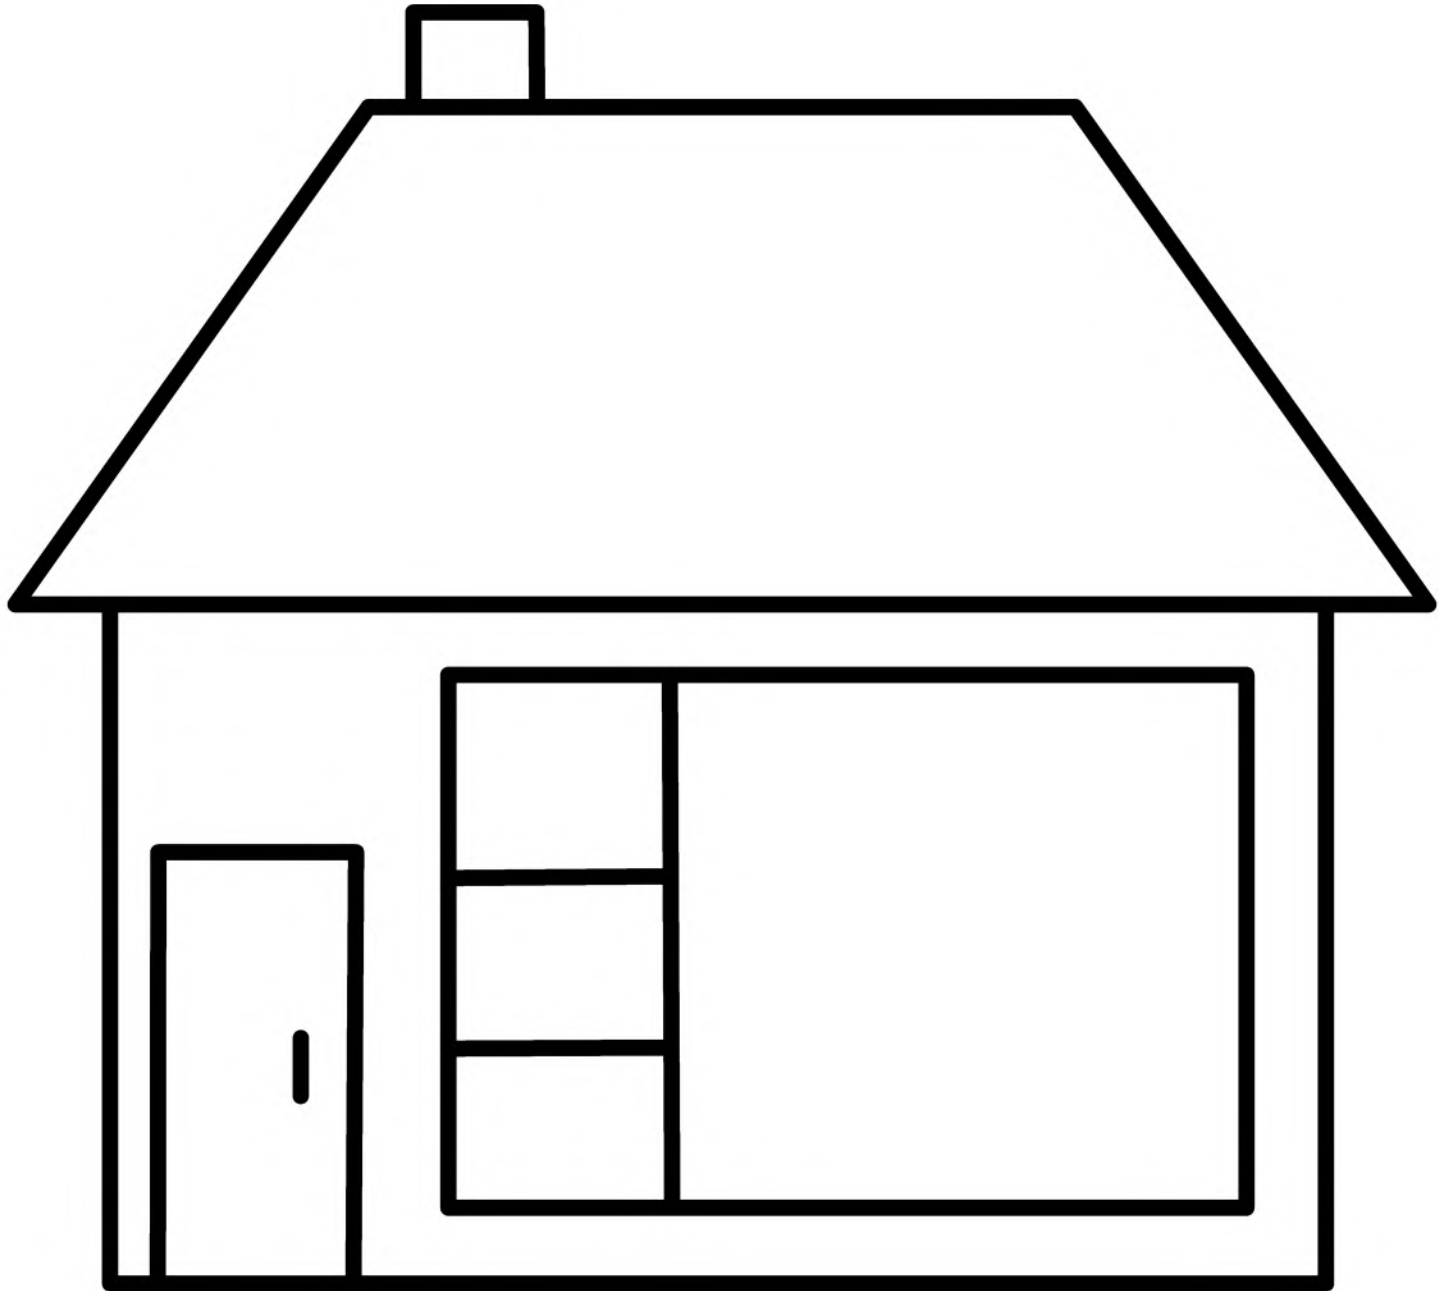

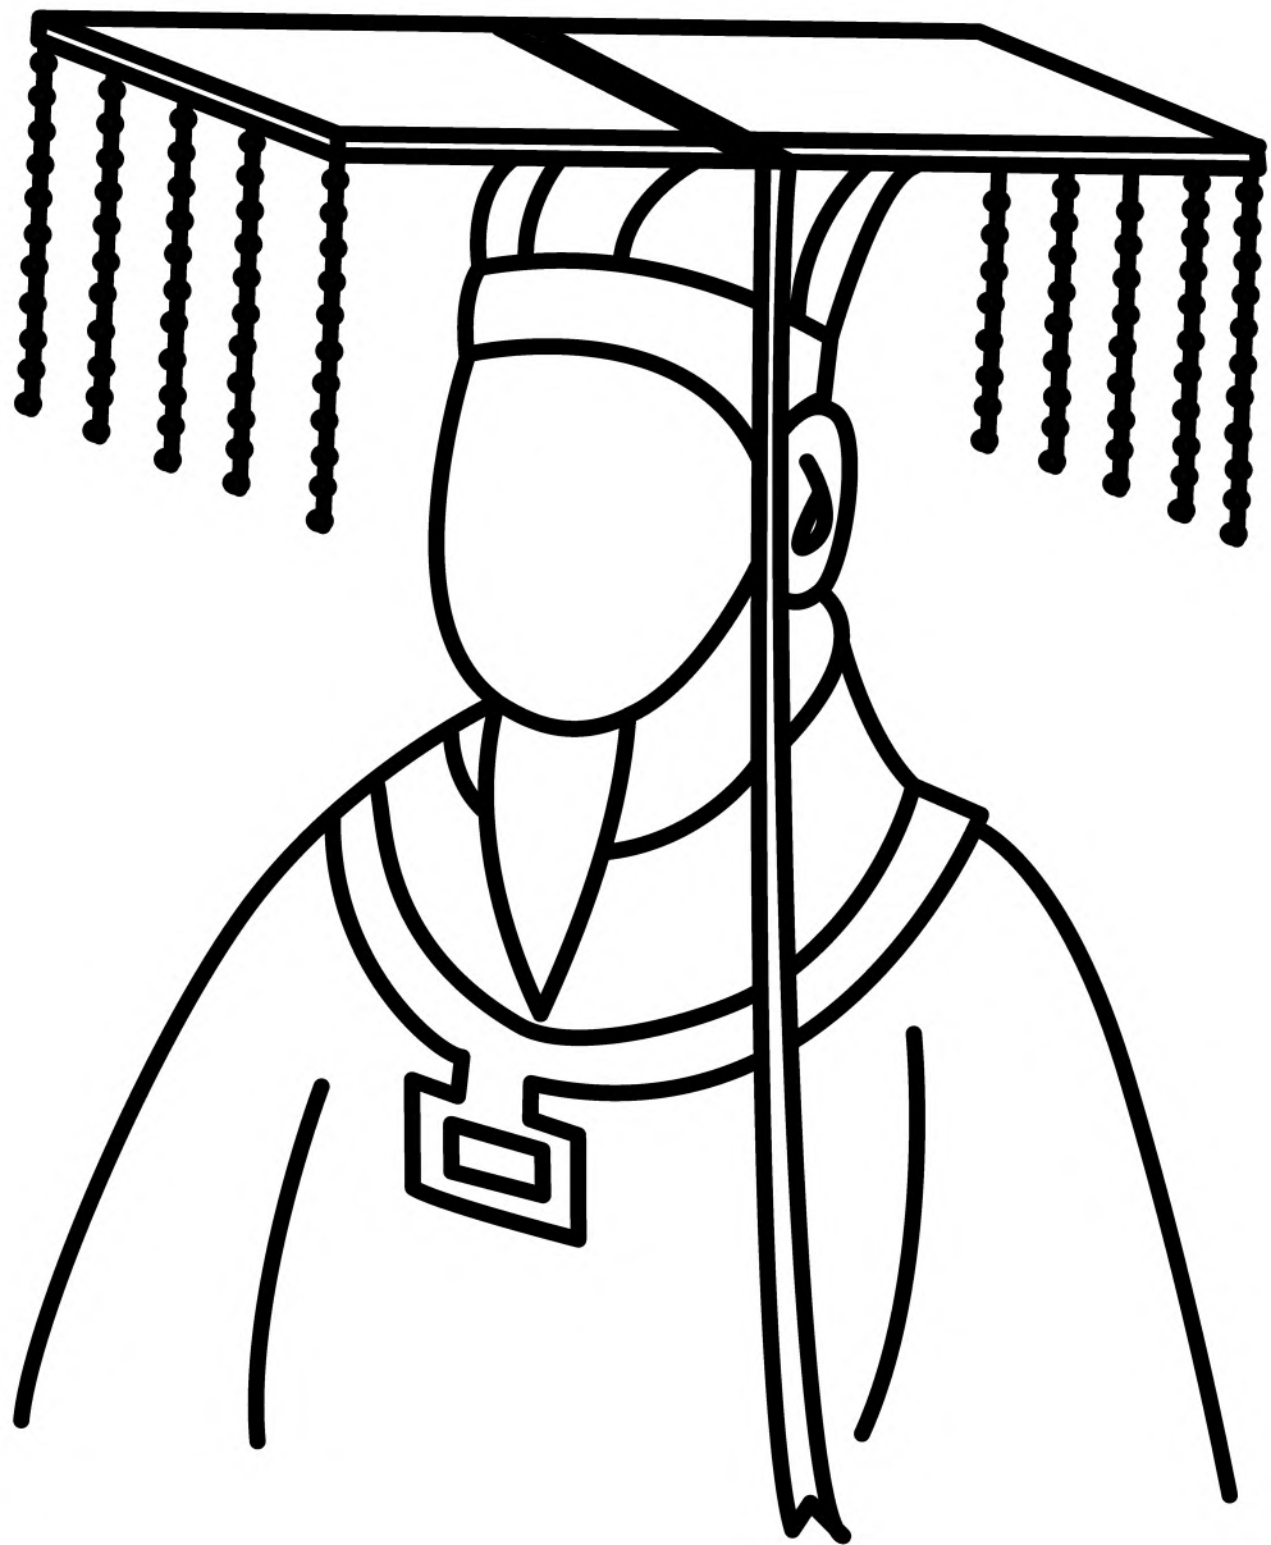

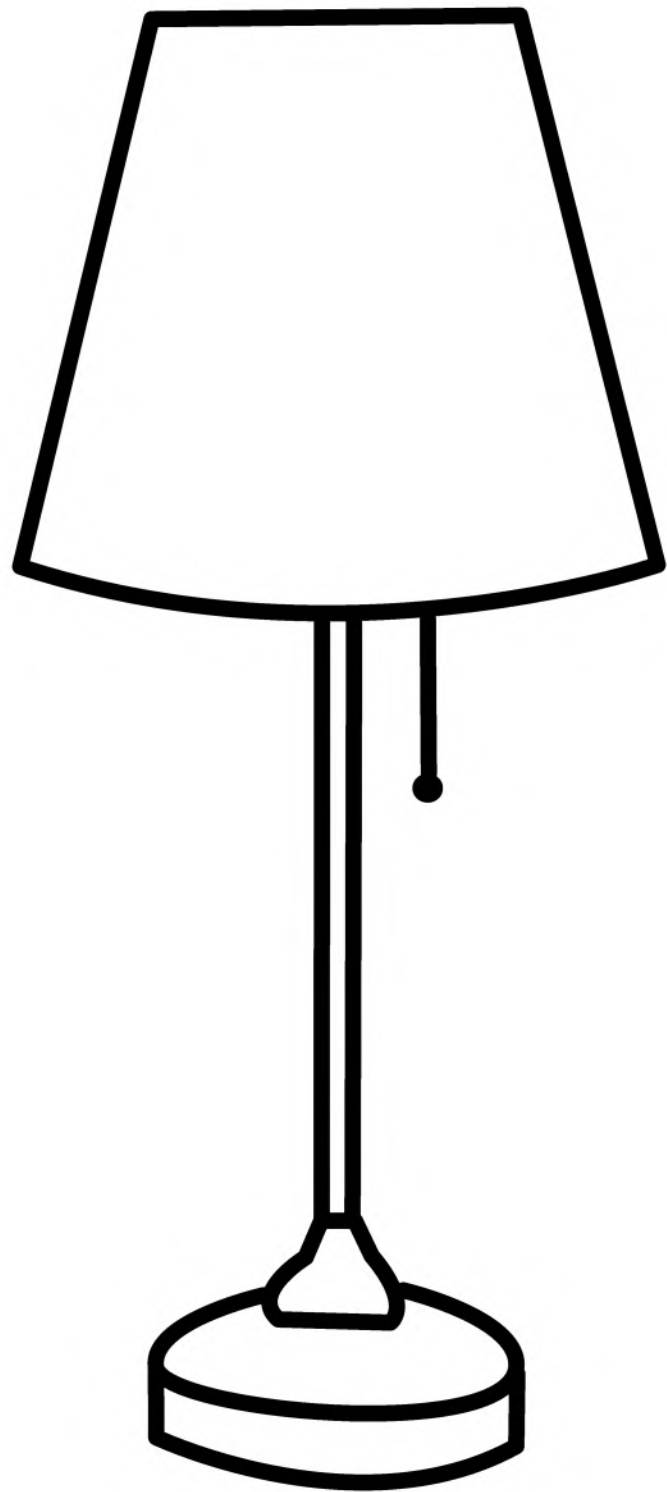

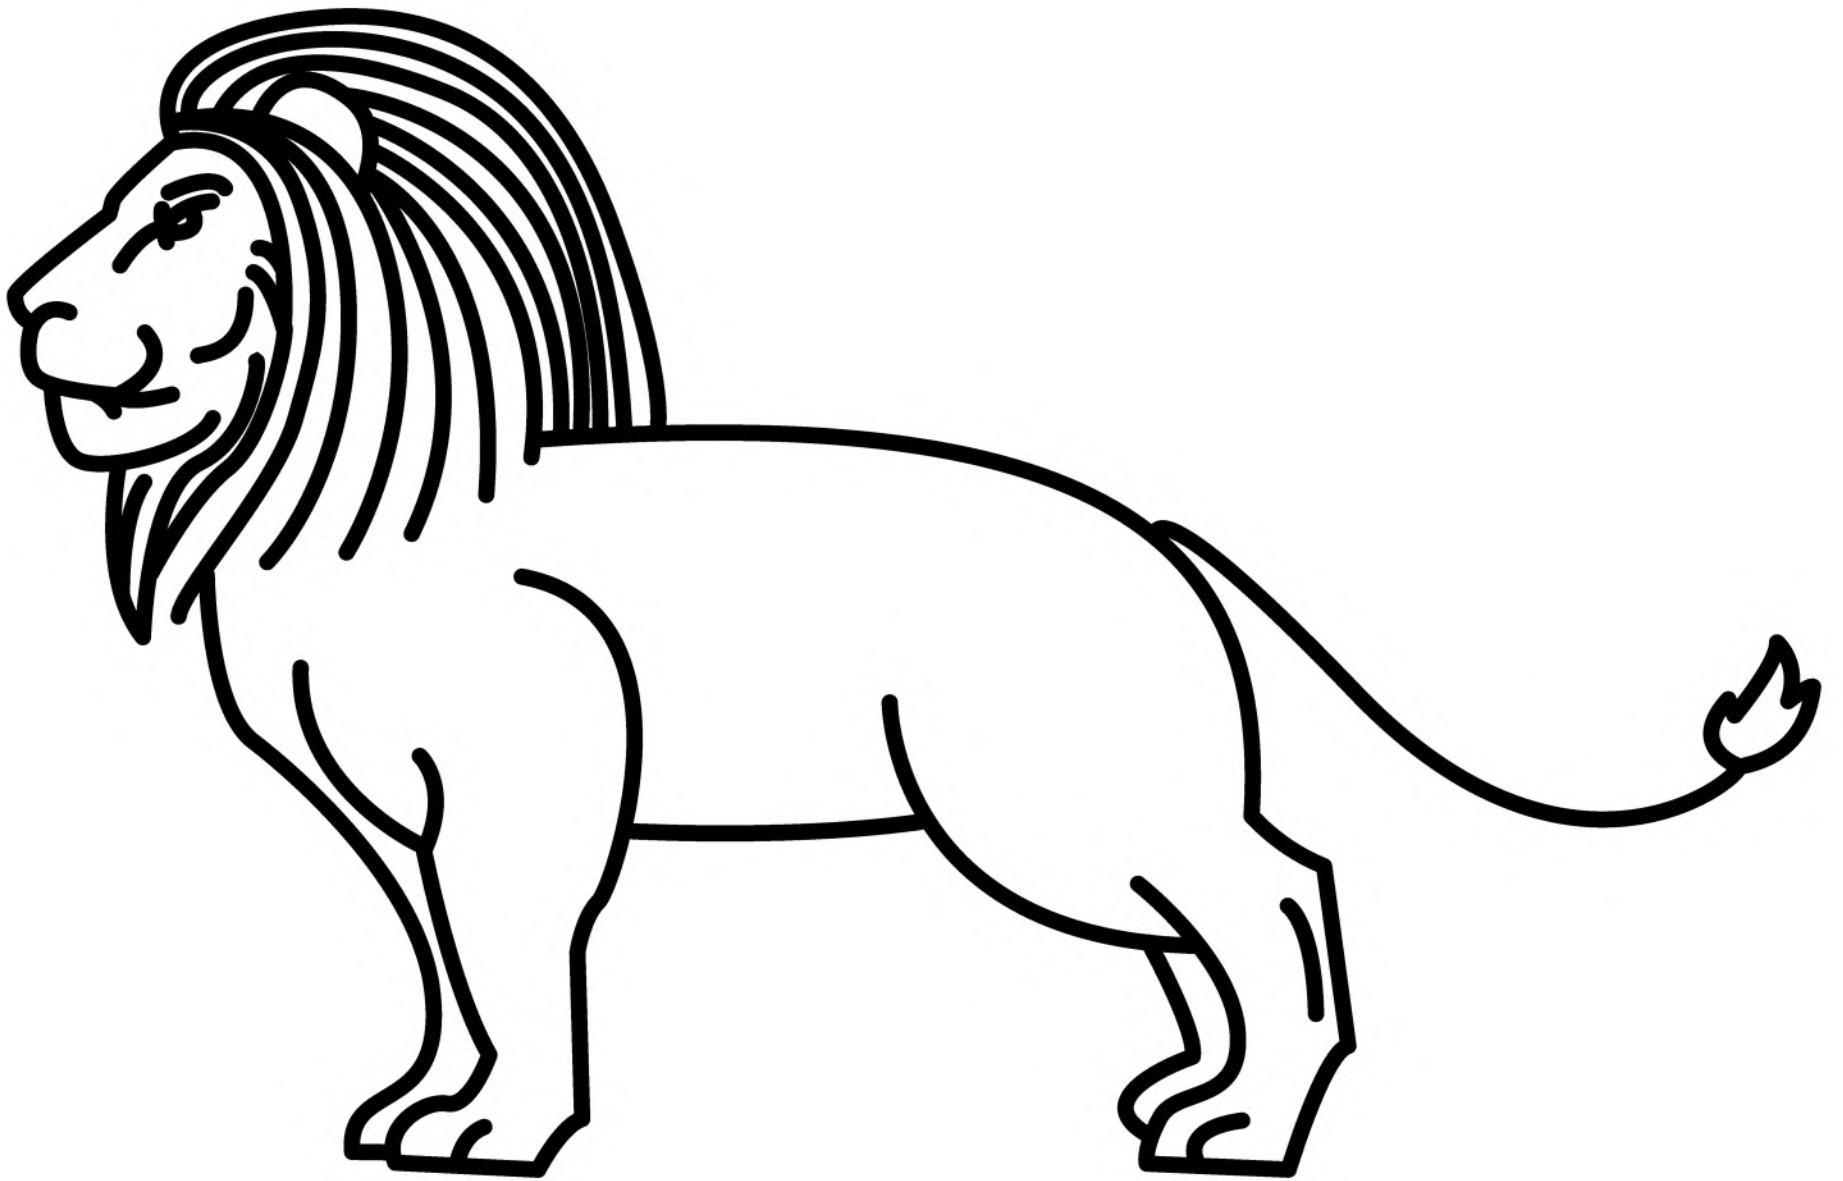



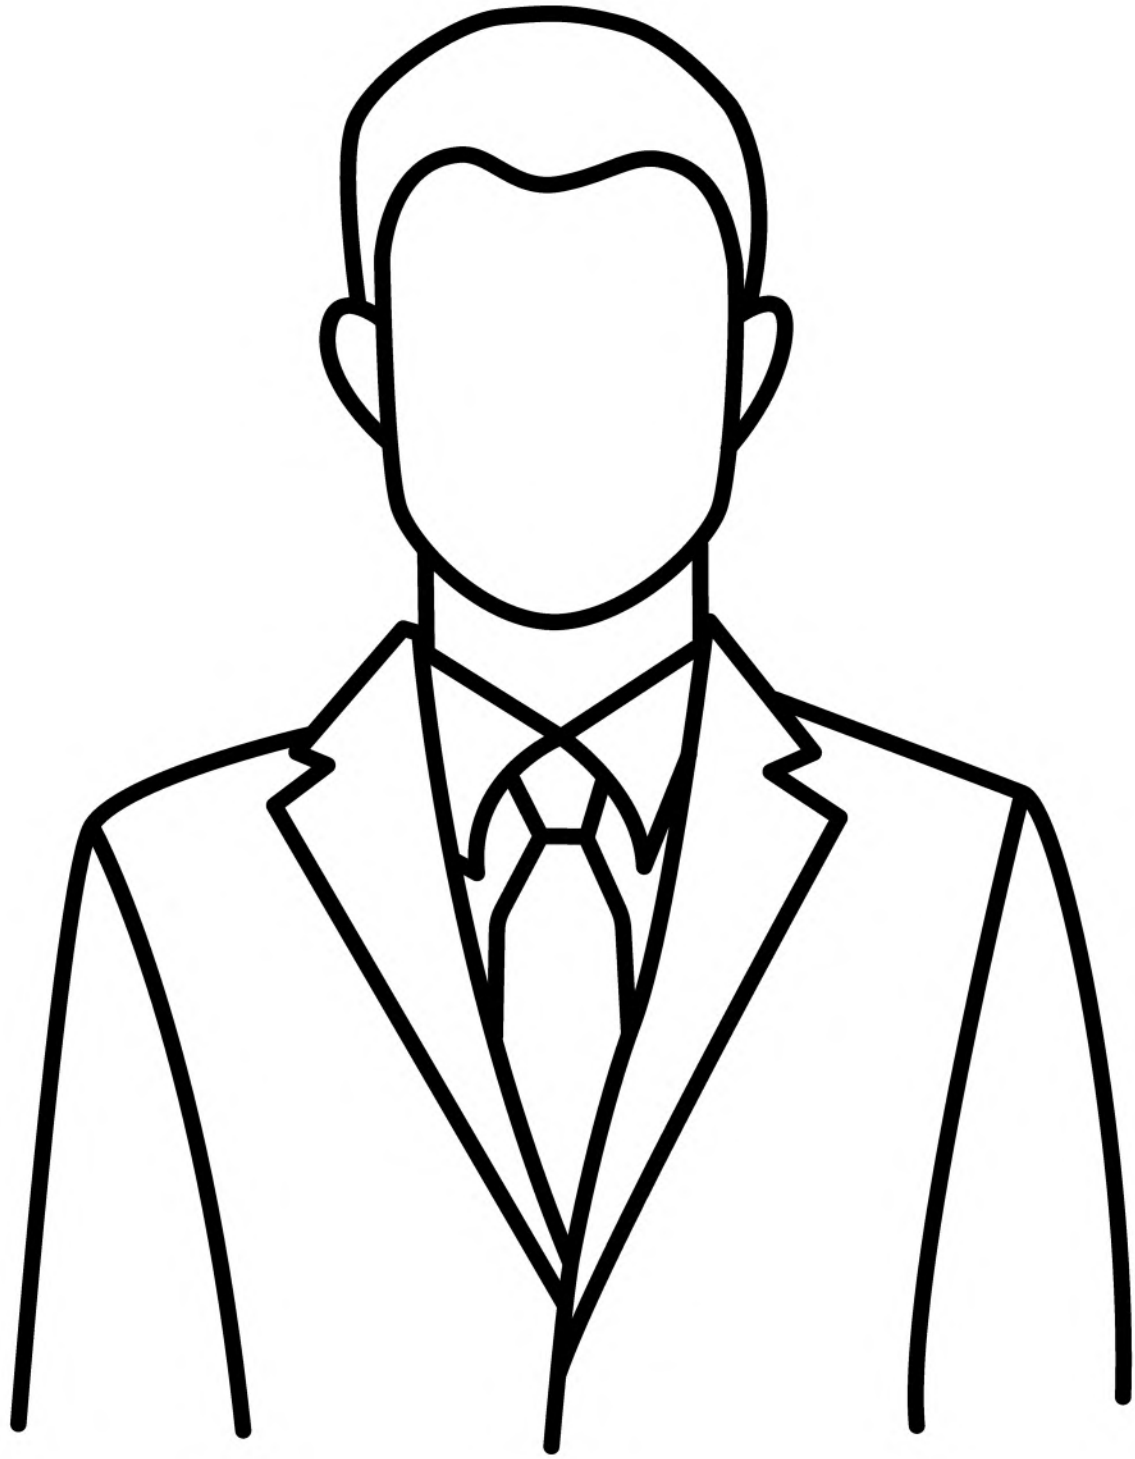

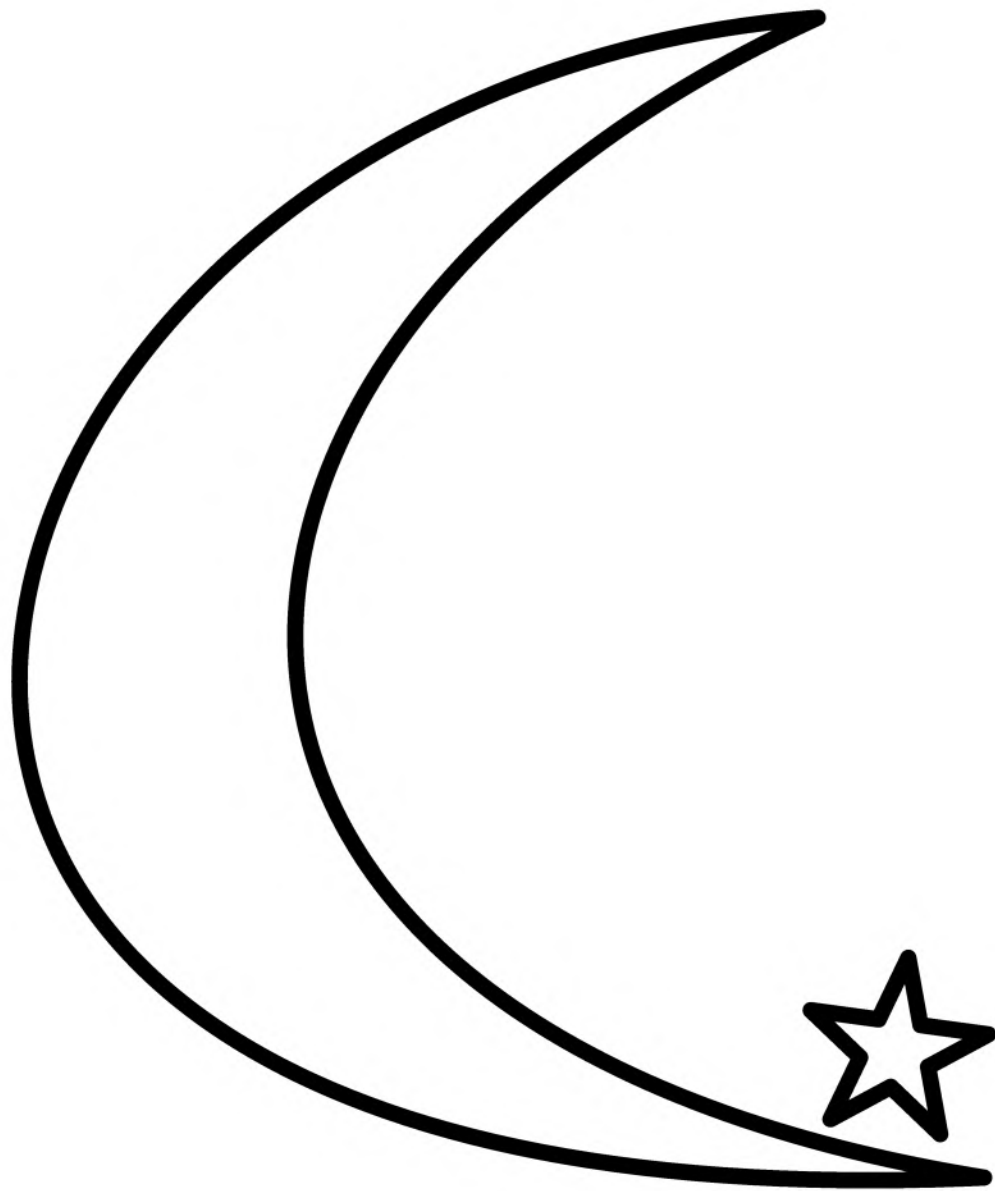

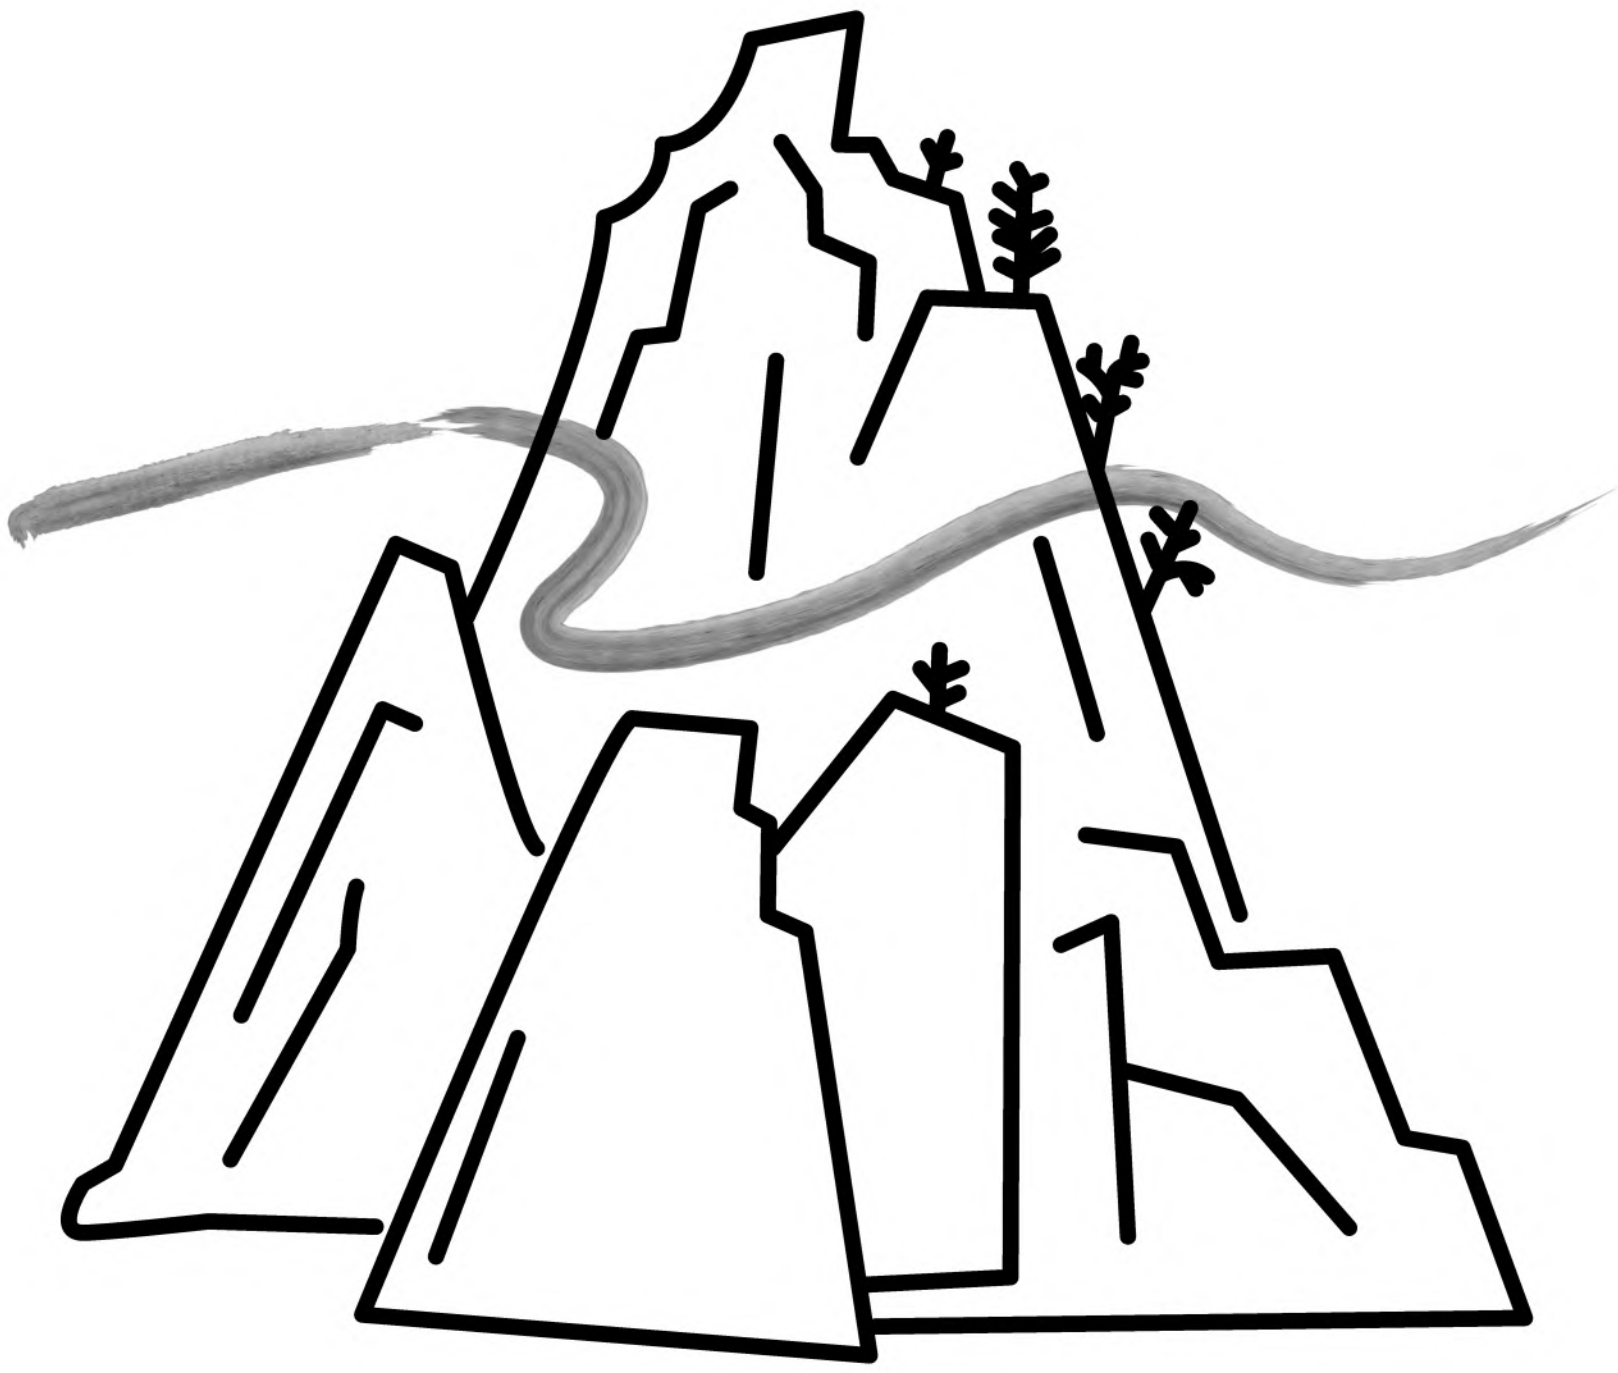

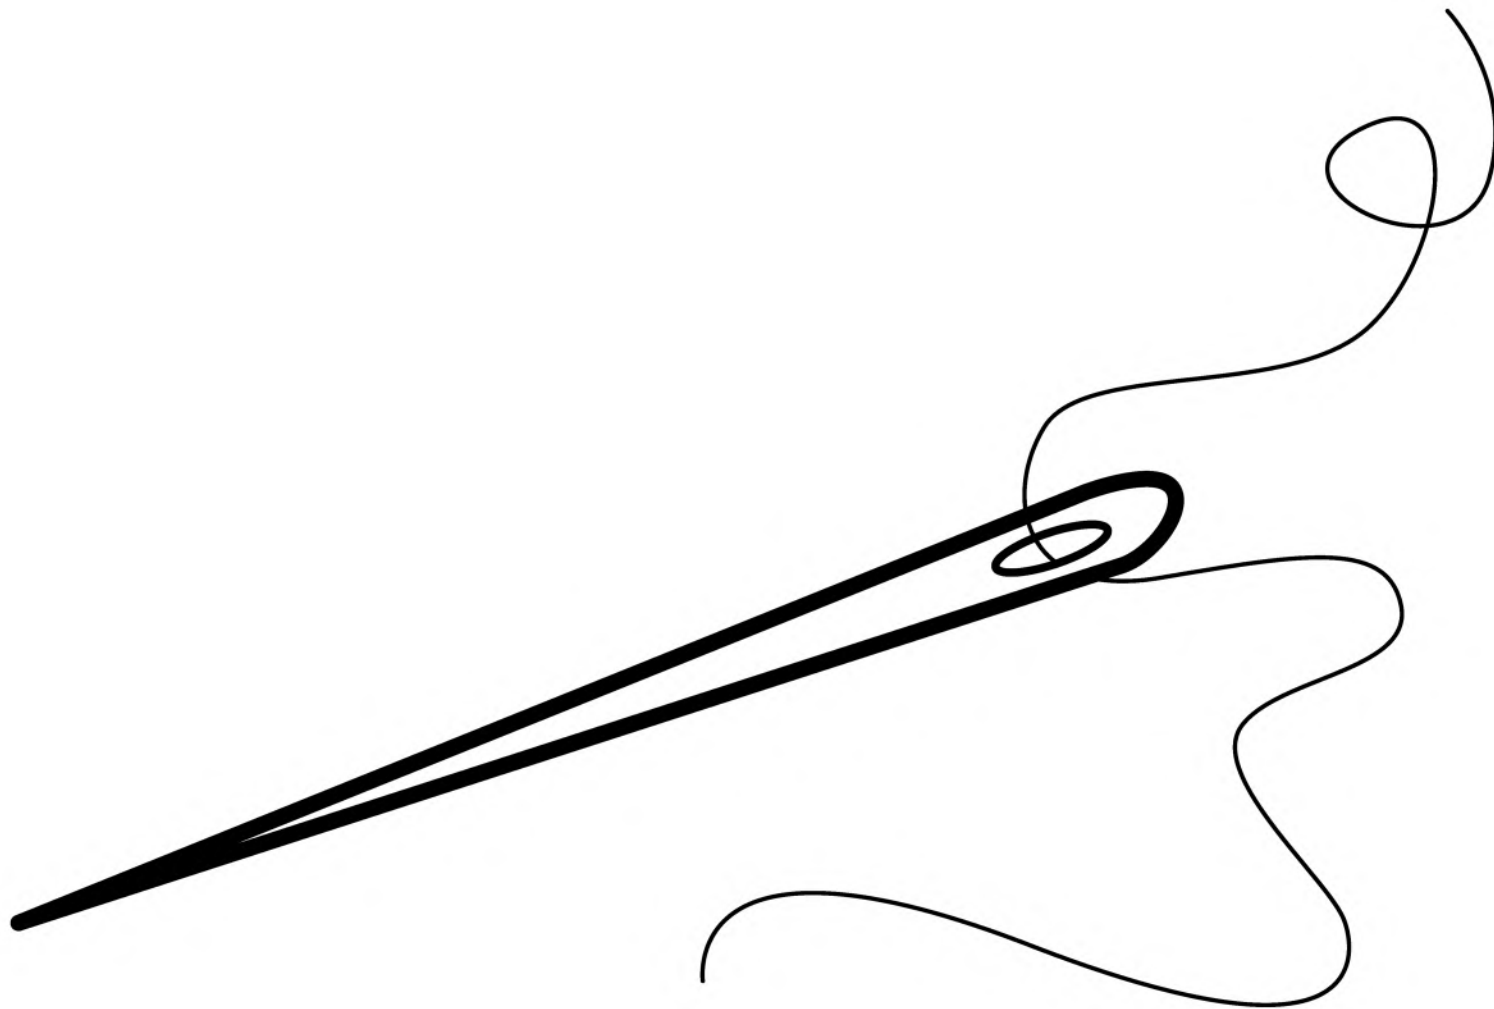

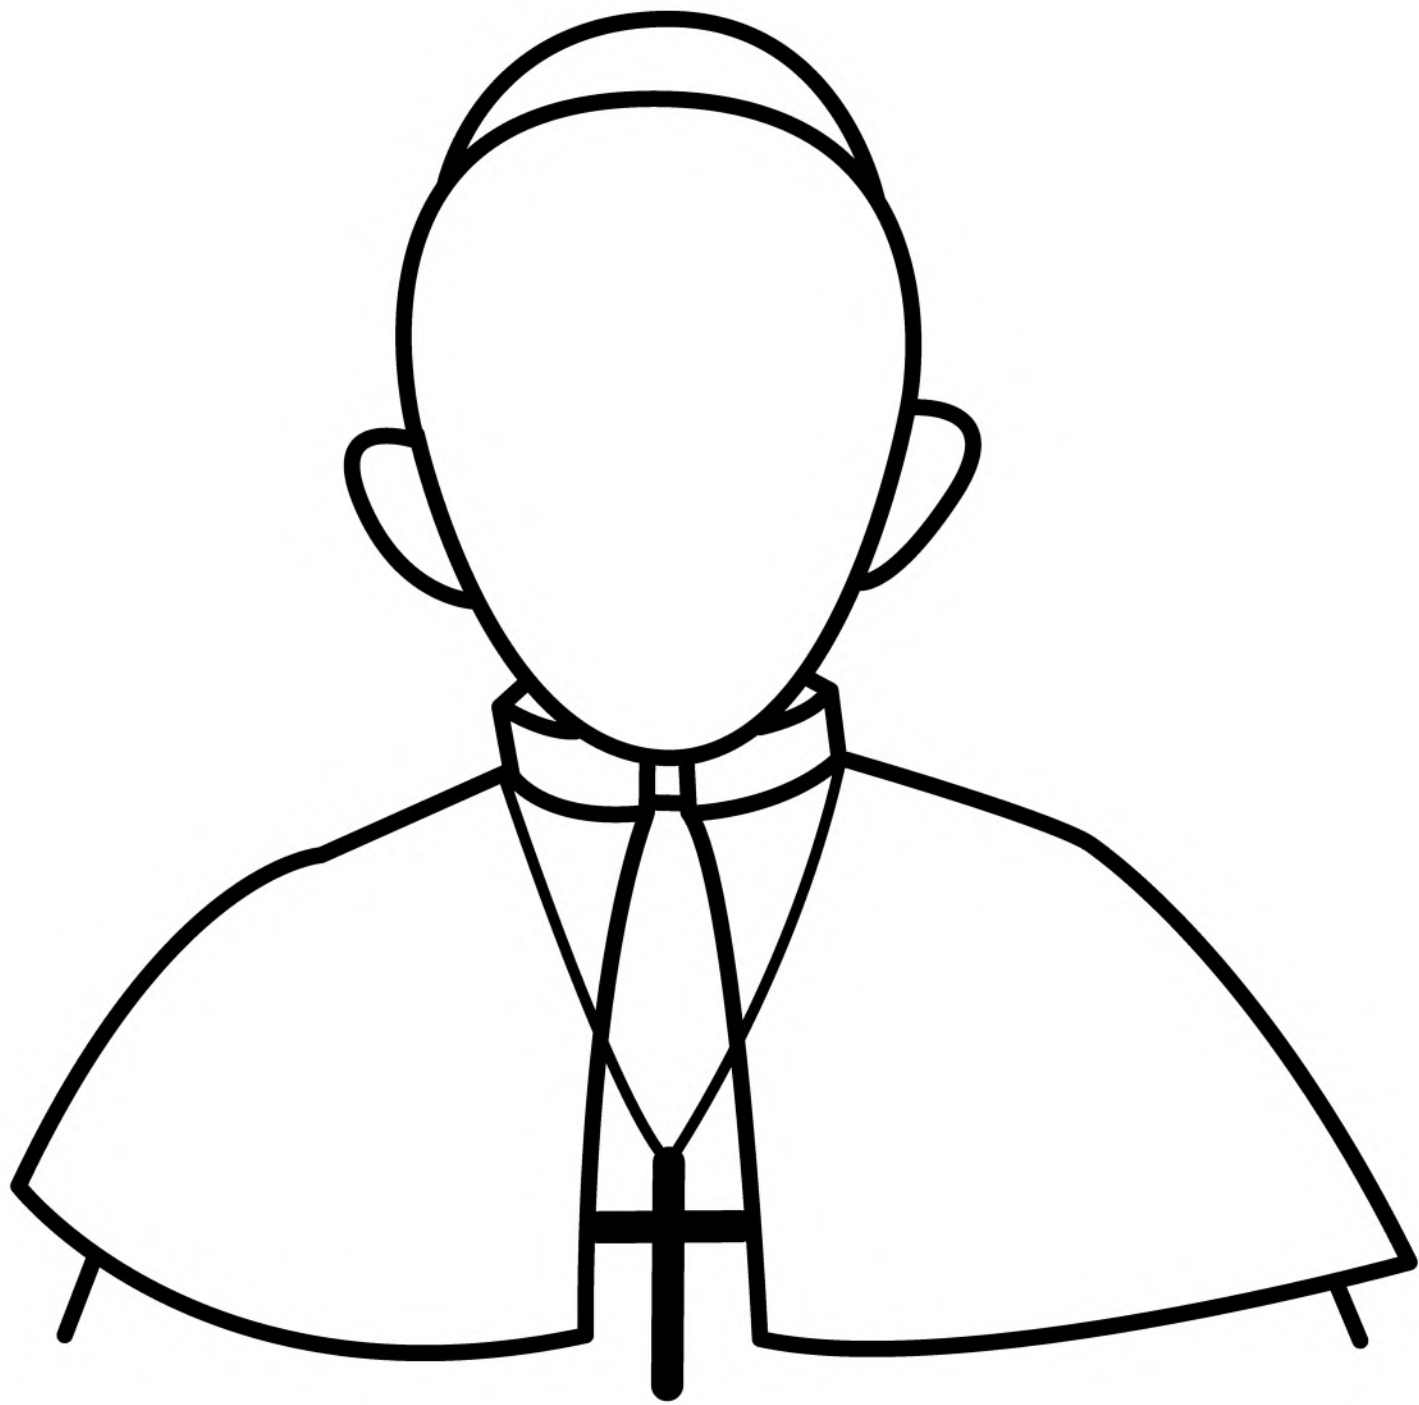

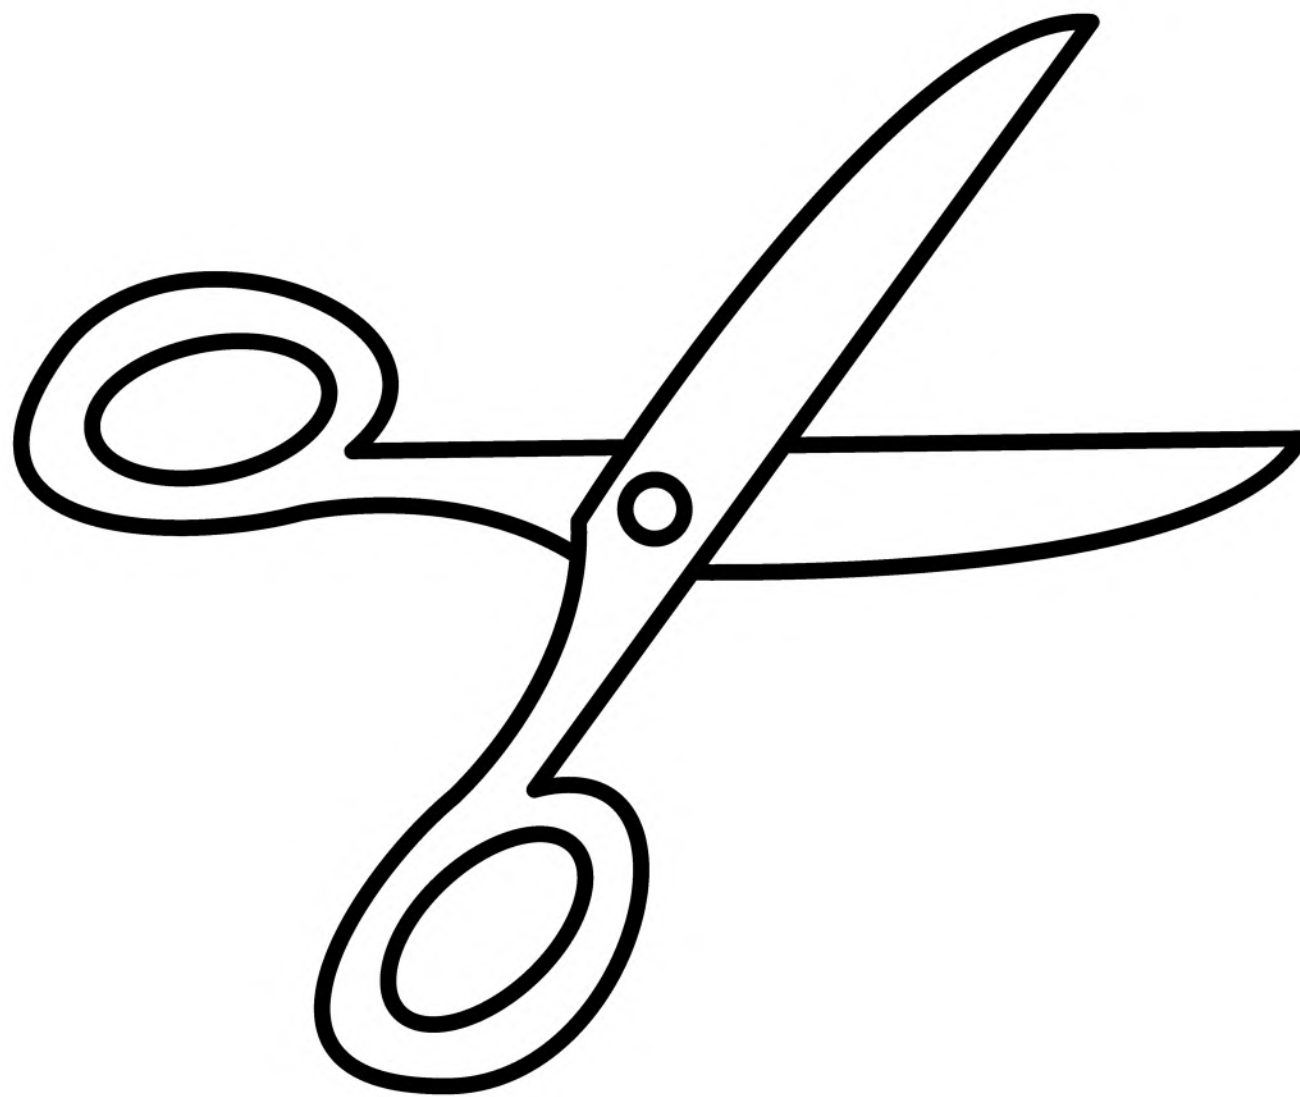

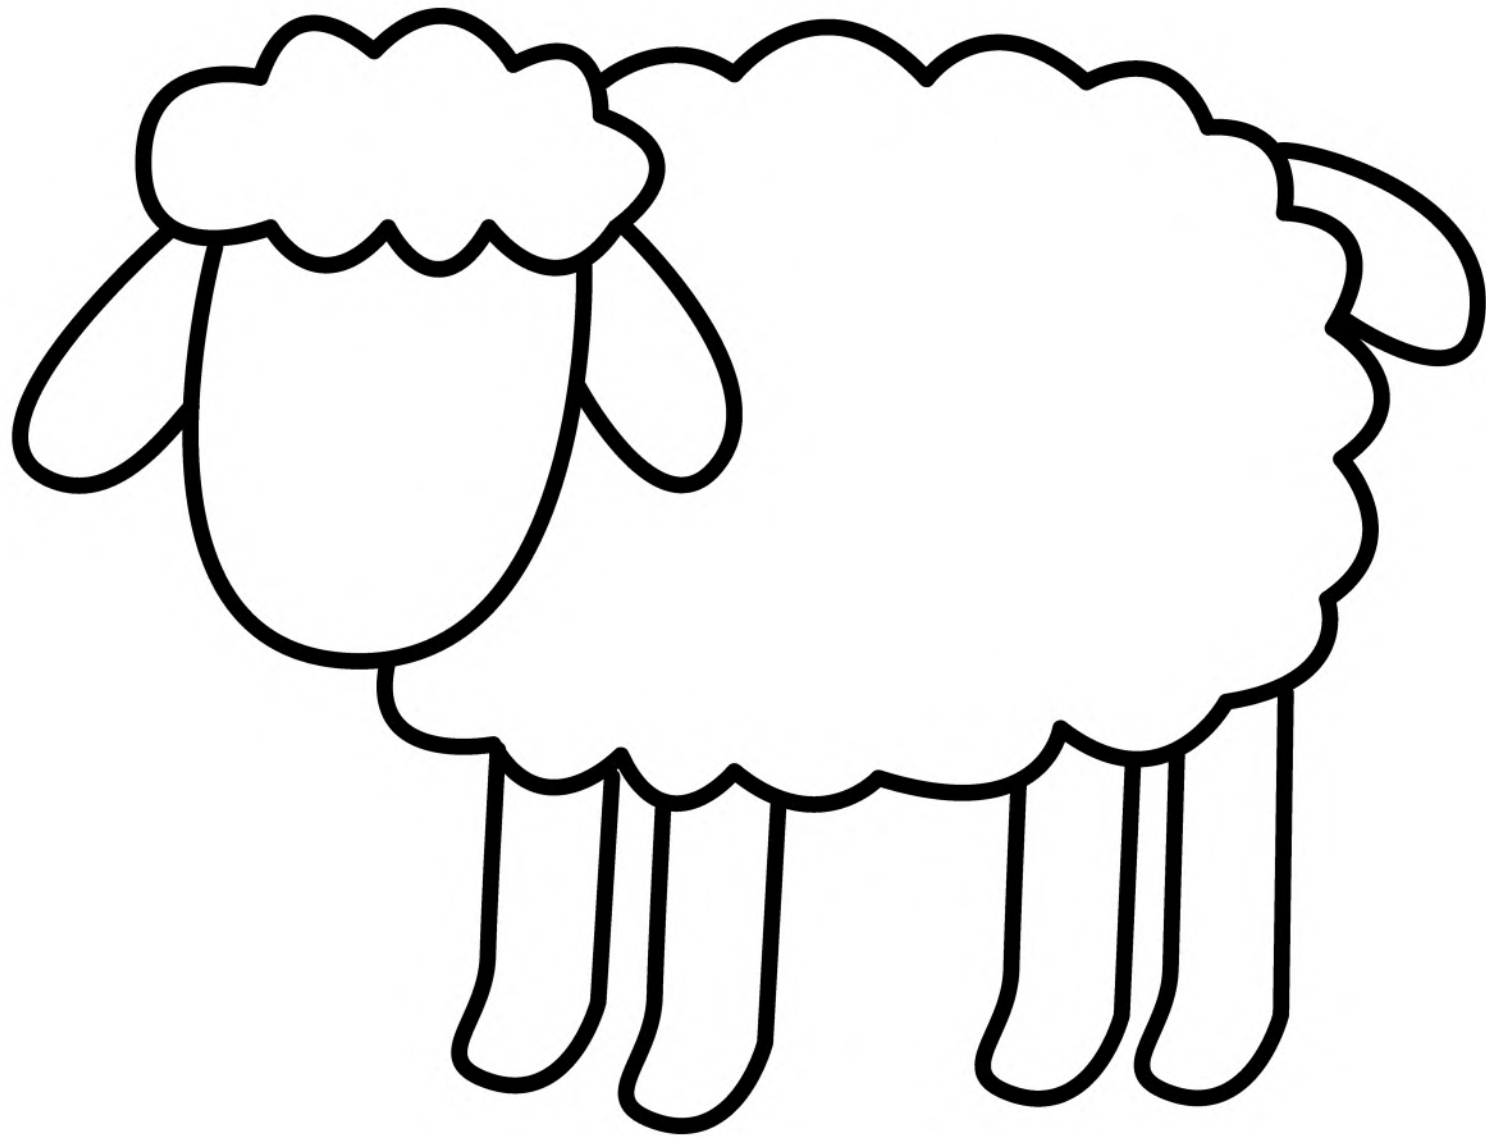

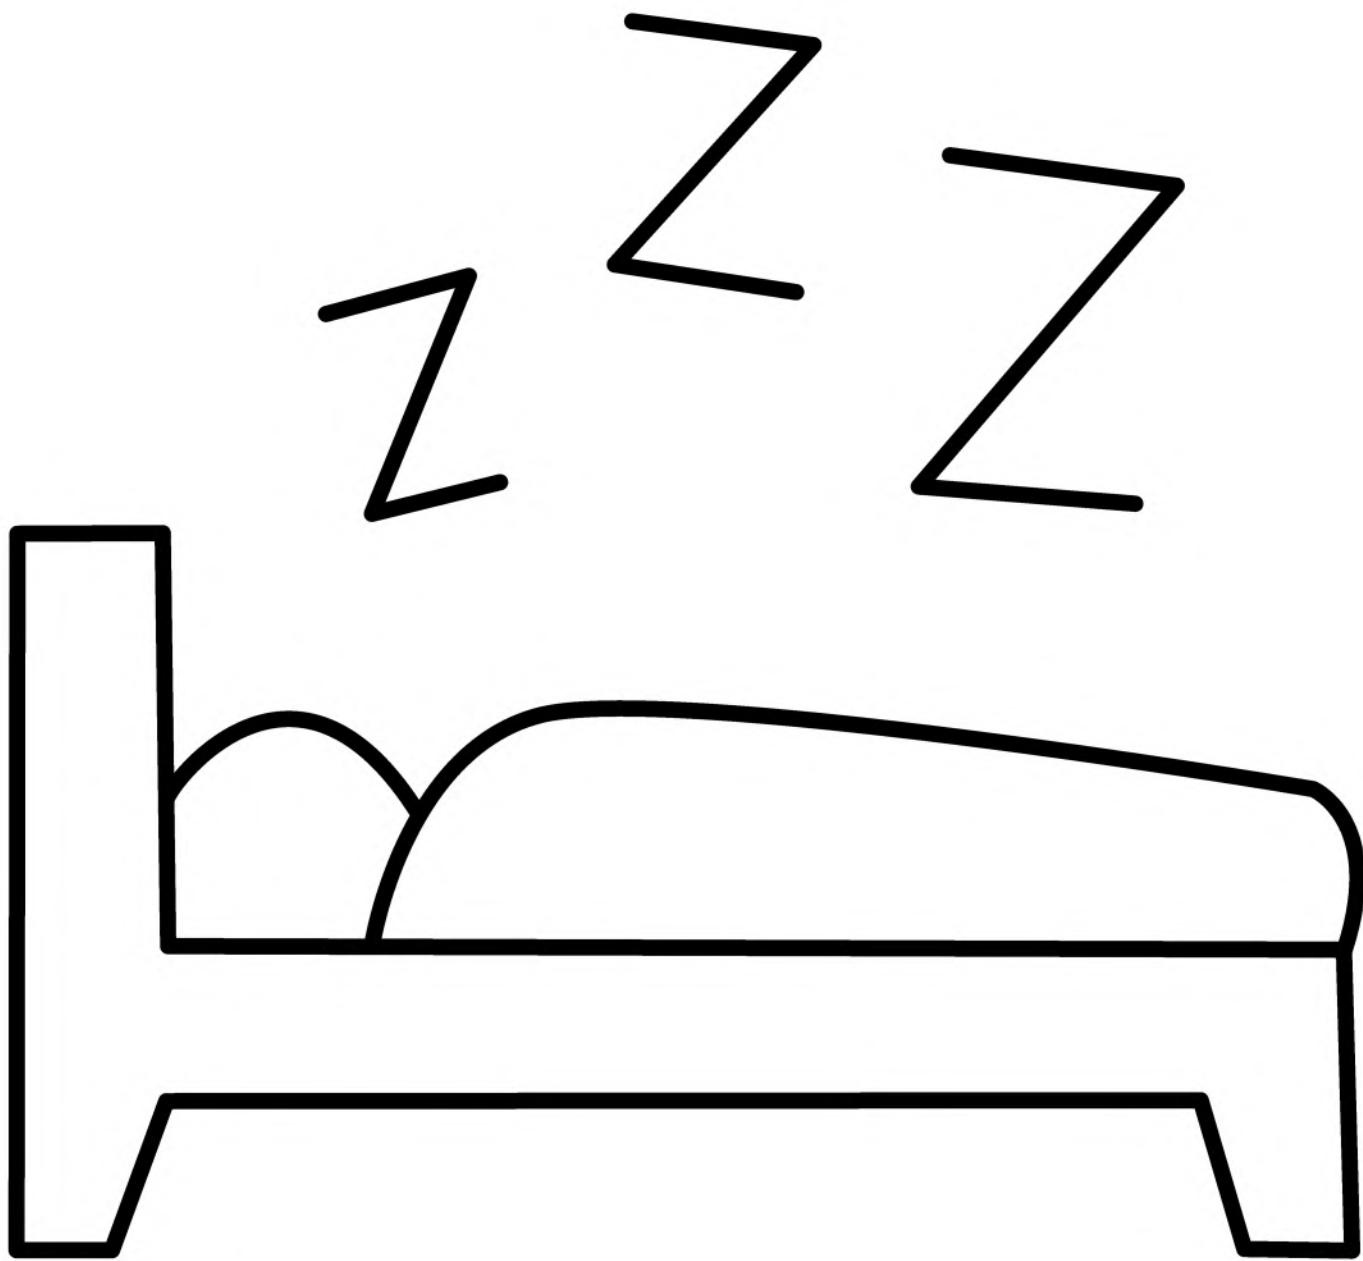



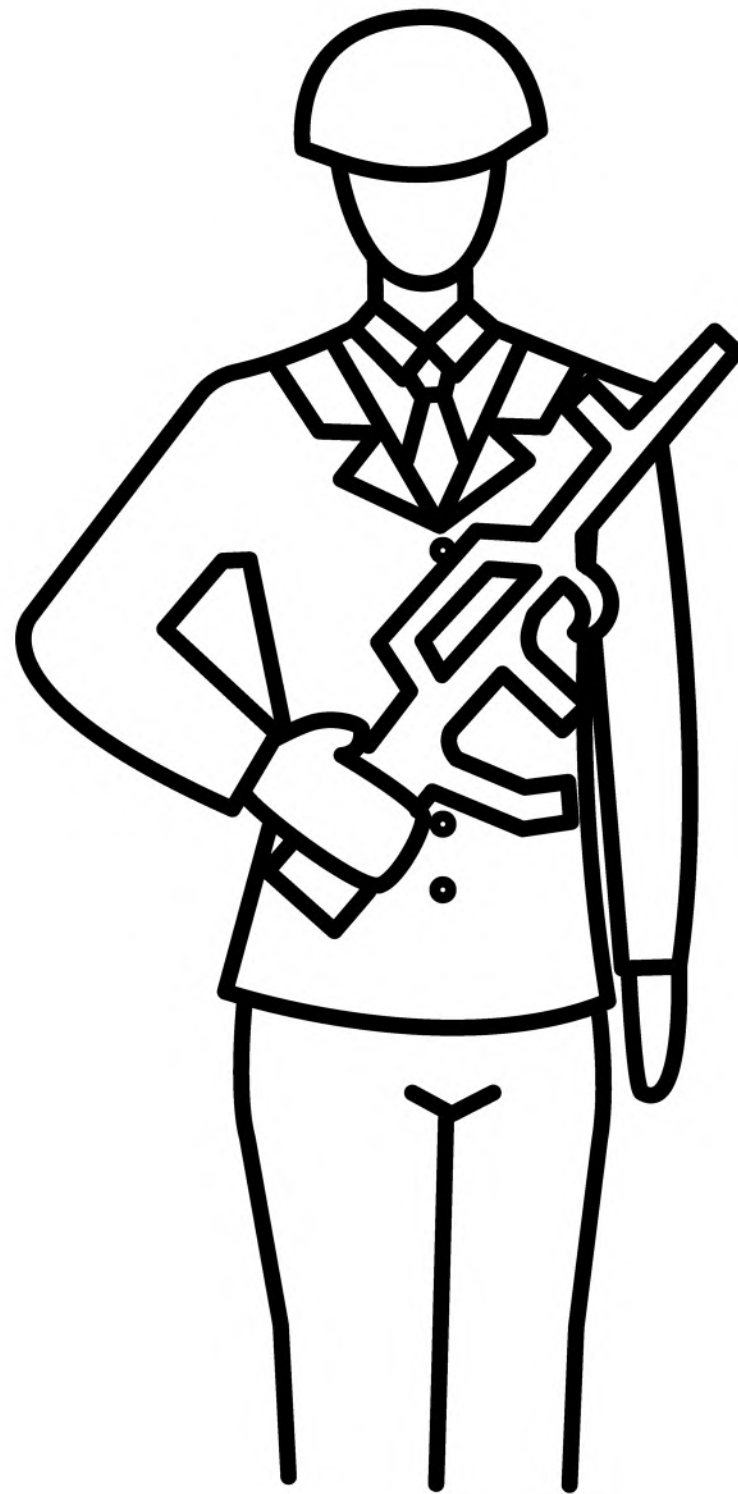

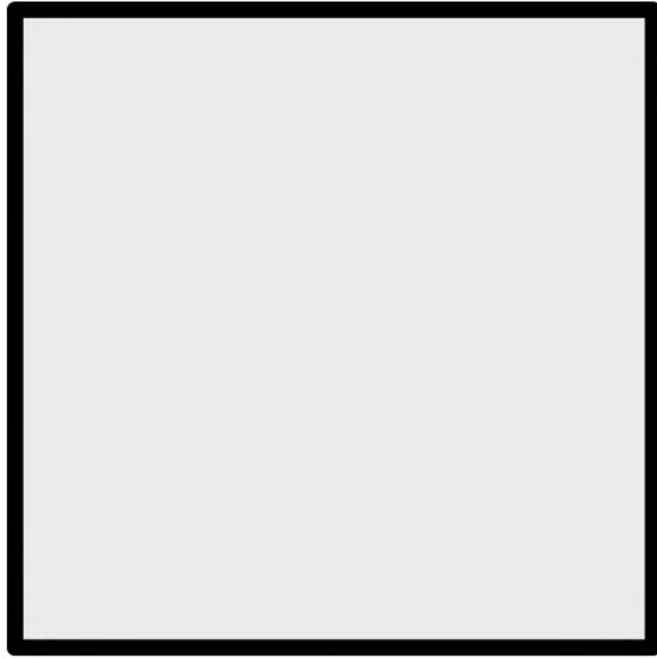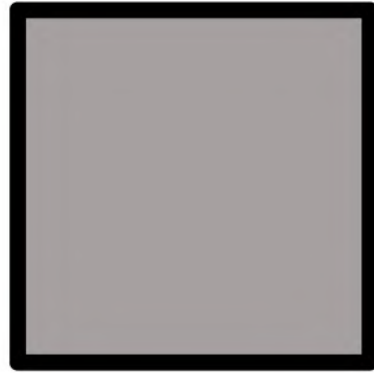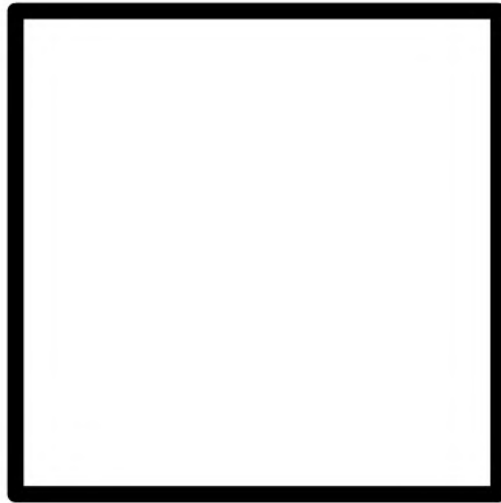

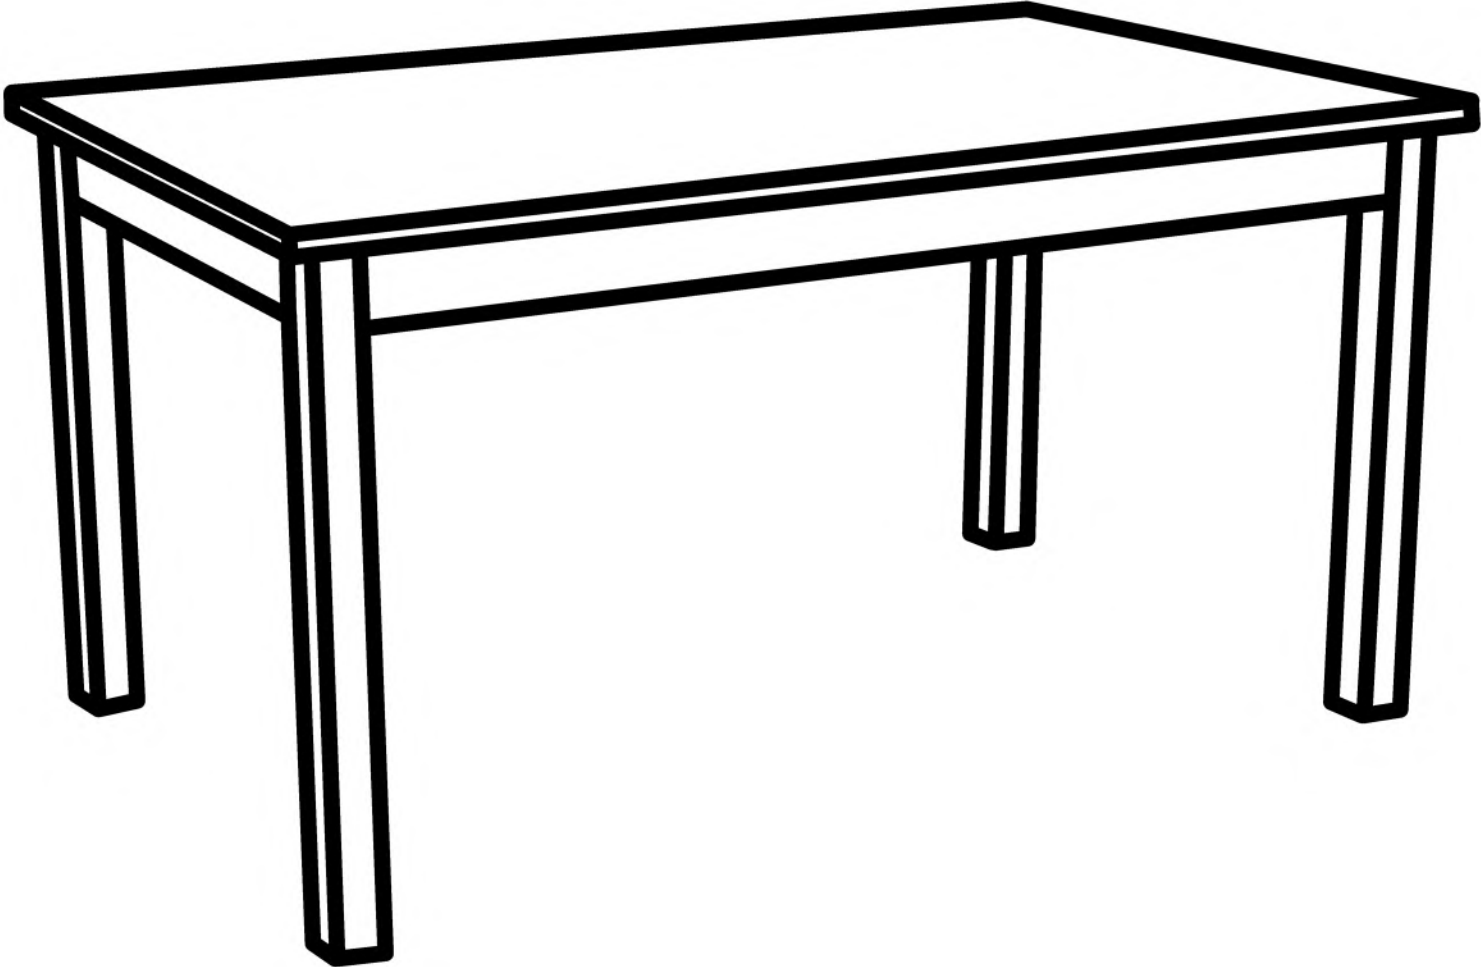

table

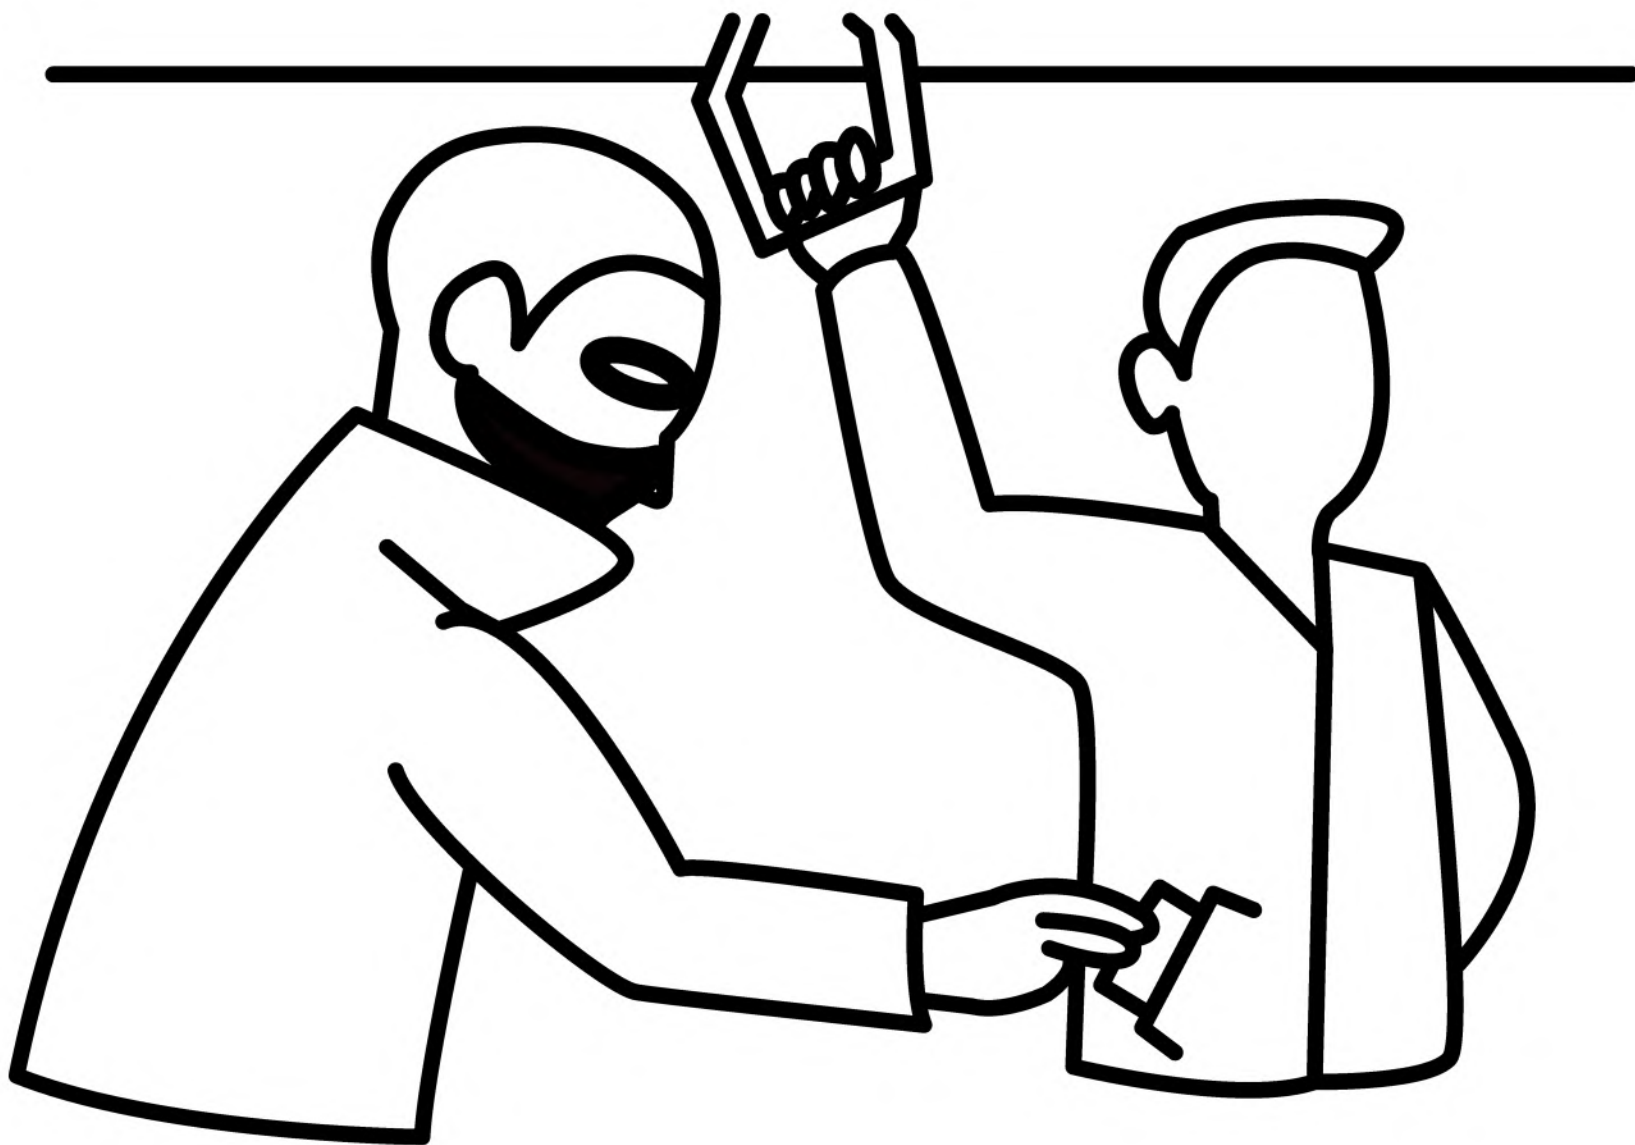

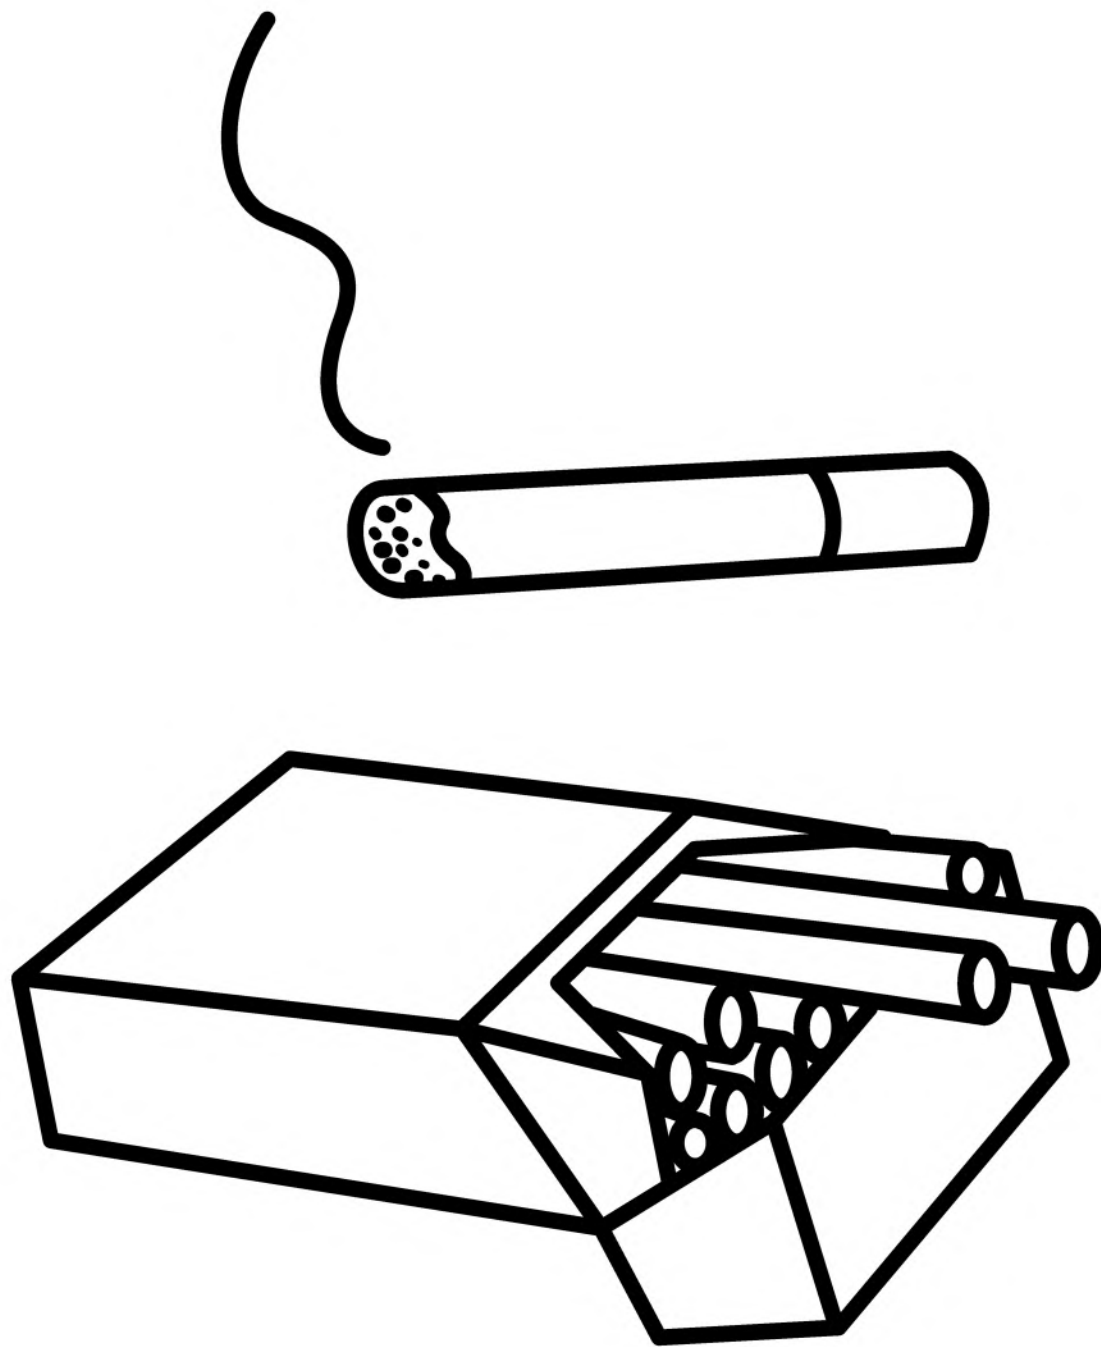

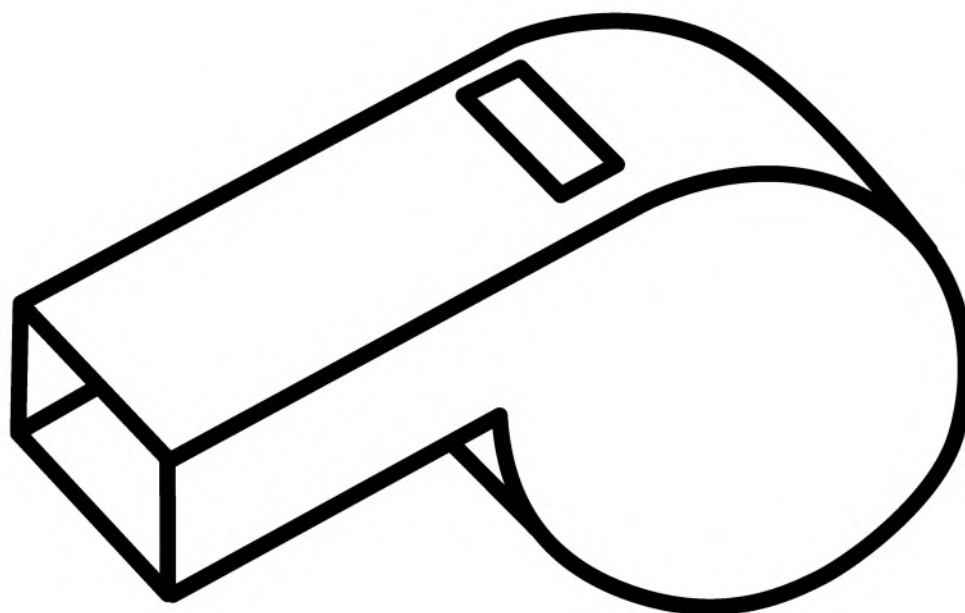

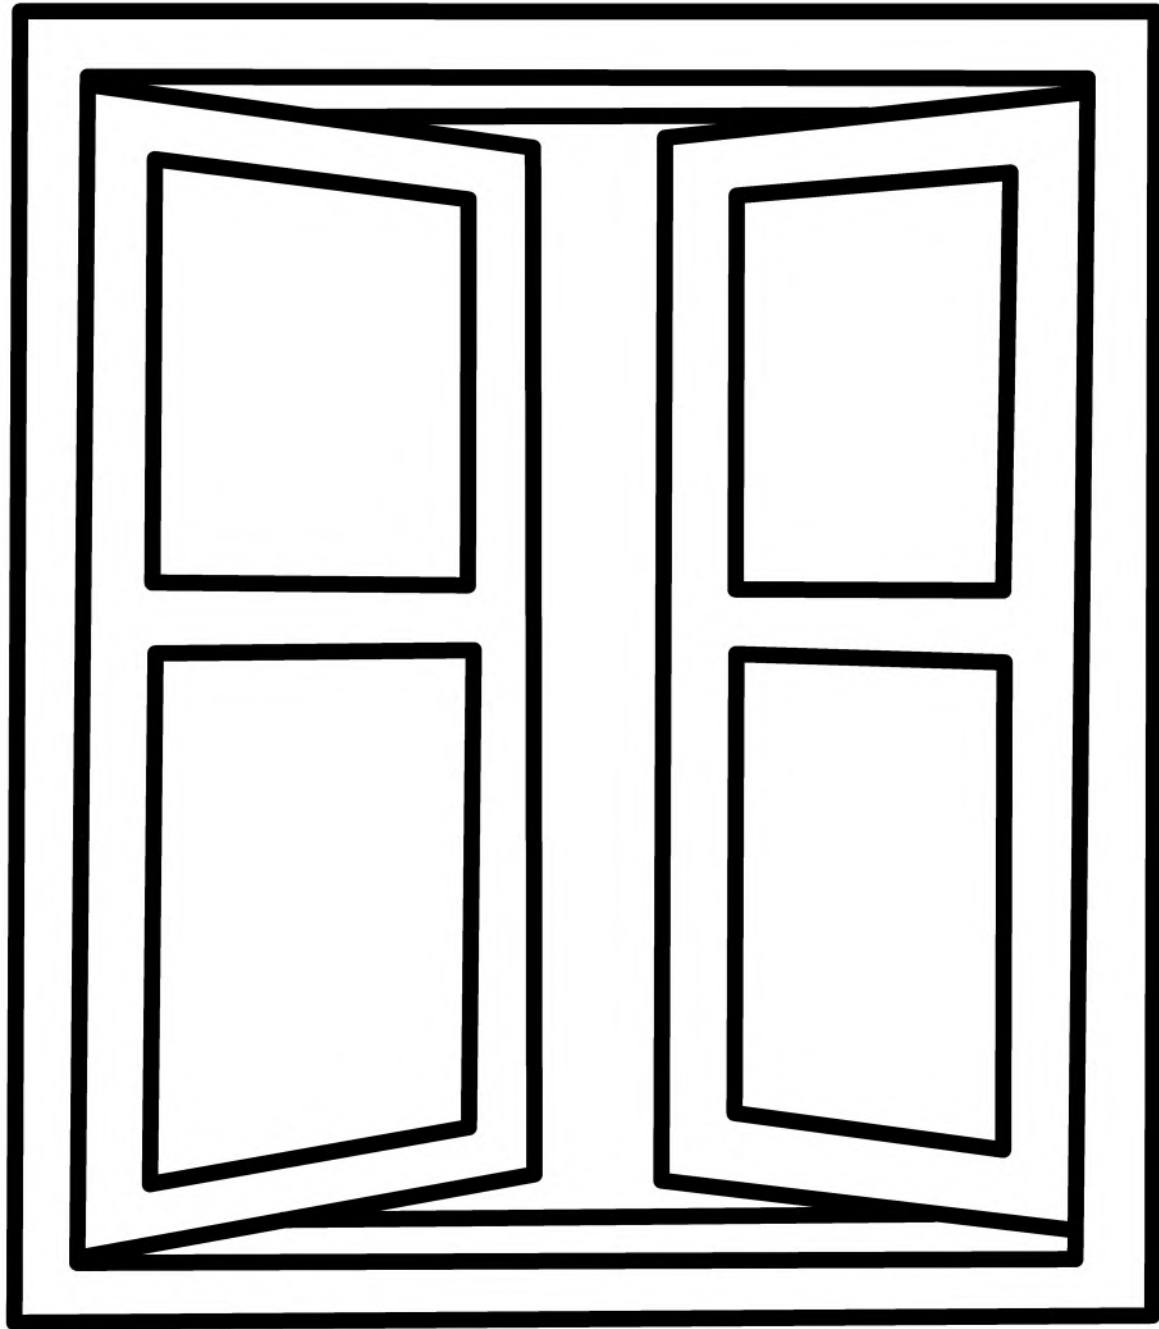

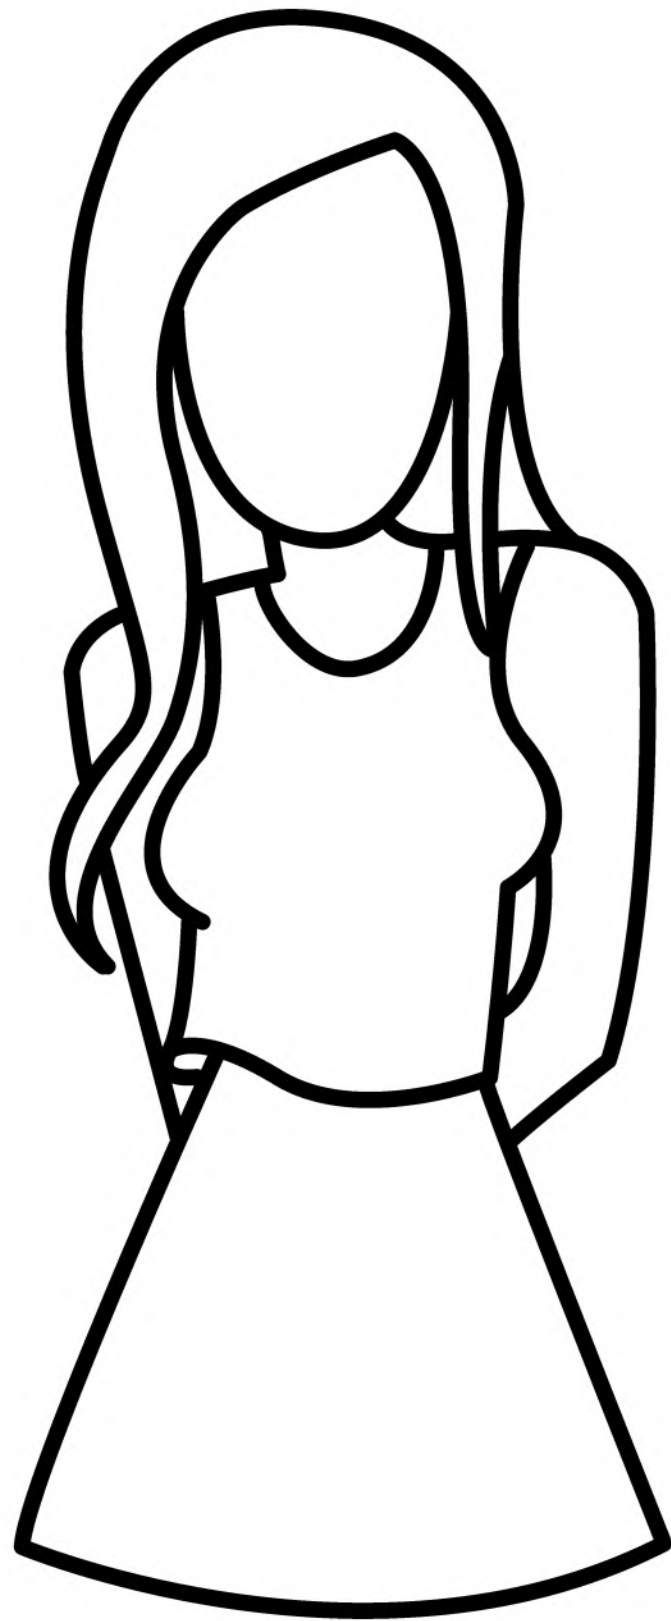



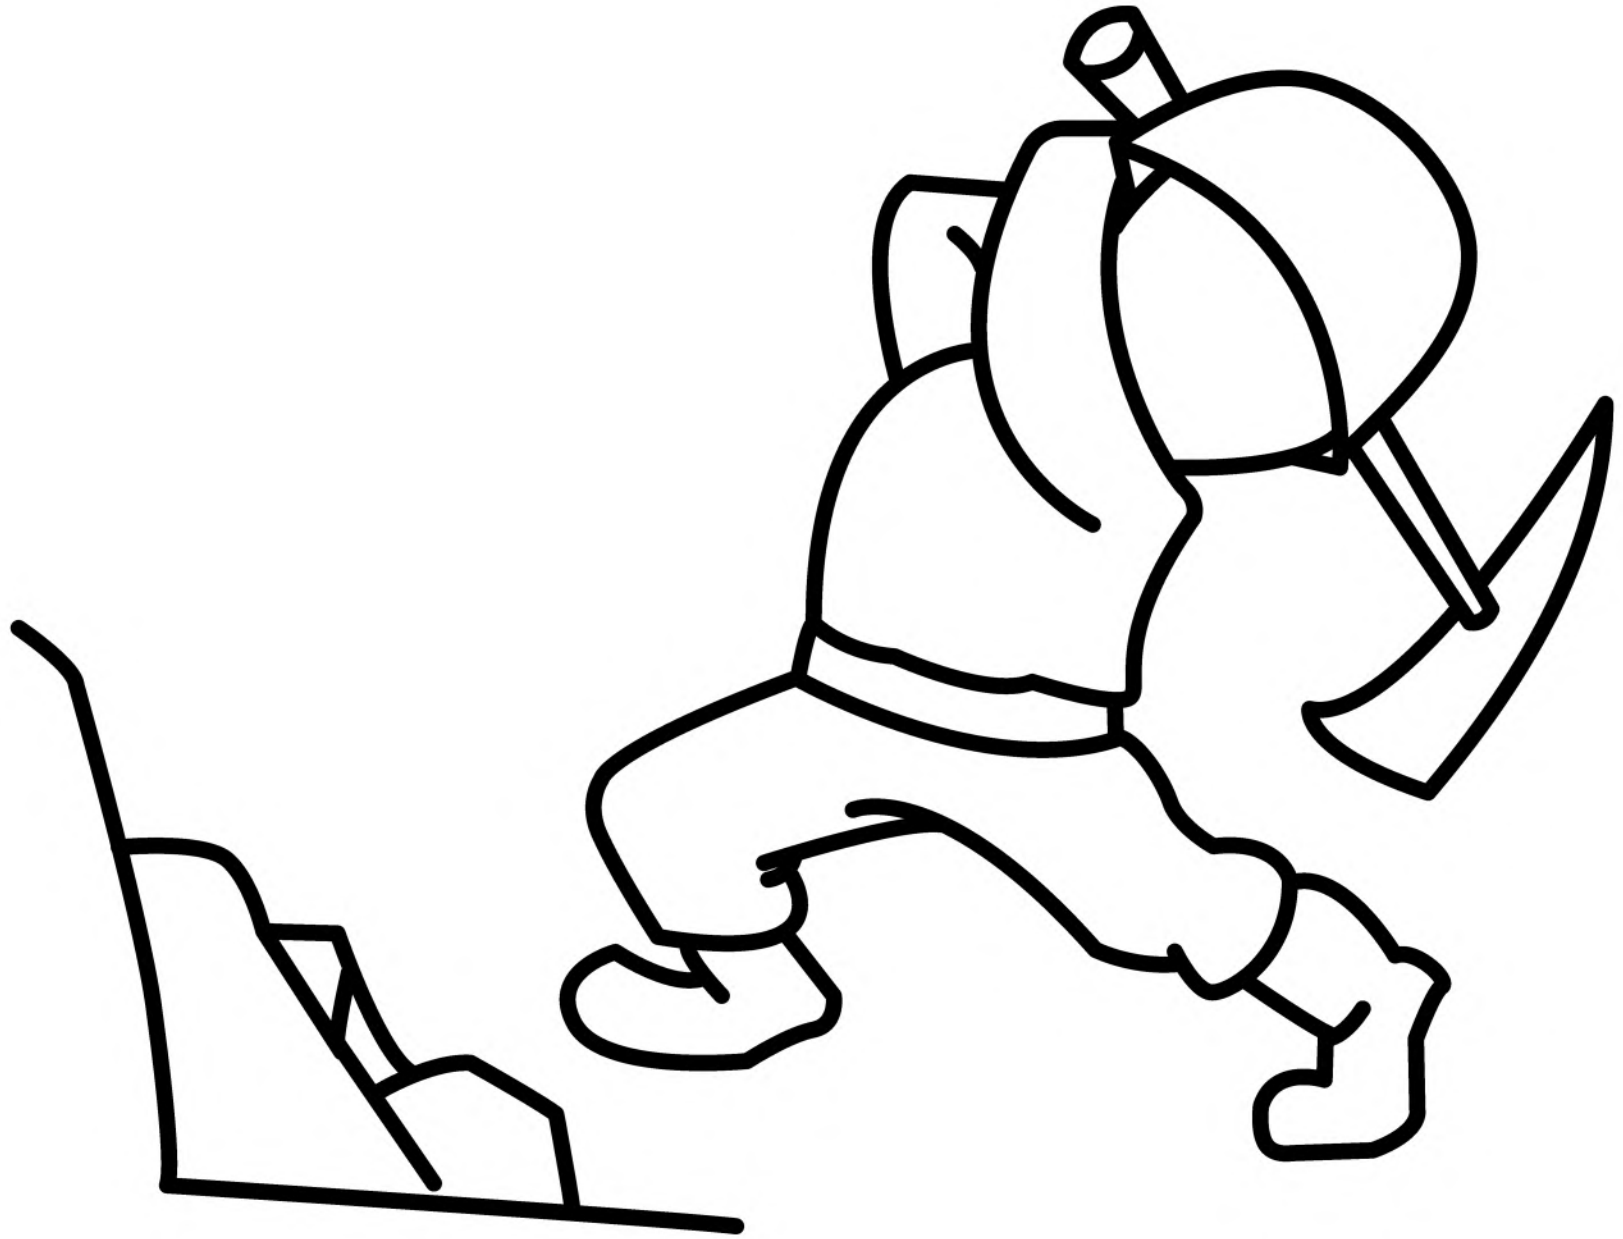

Supplement: Supplementary_File_S1_stimuliPictures.pdf [file Supplementary_File_S1_stimuliPictures.pdf]
