# Supplementary material for: Brain hothubs and dark functional networks: correlation analysis between amplitude and connectivity for Broca’s aphasia
Source: PeerJ journal article supplement (doi:10.7717/peerj.10057), 2020-10-01

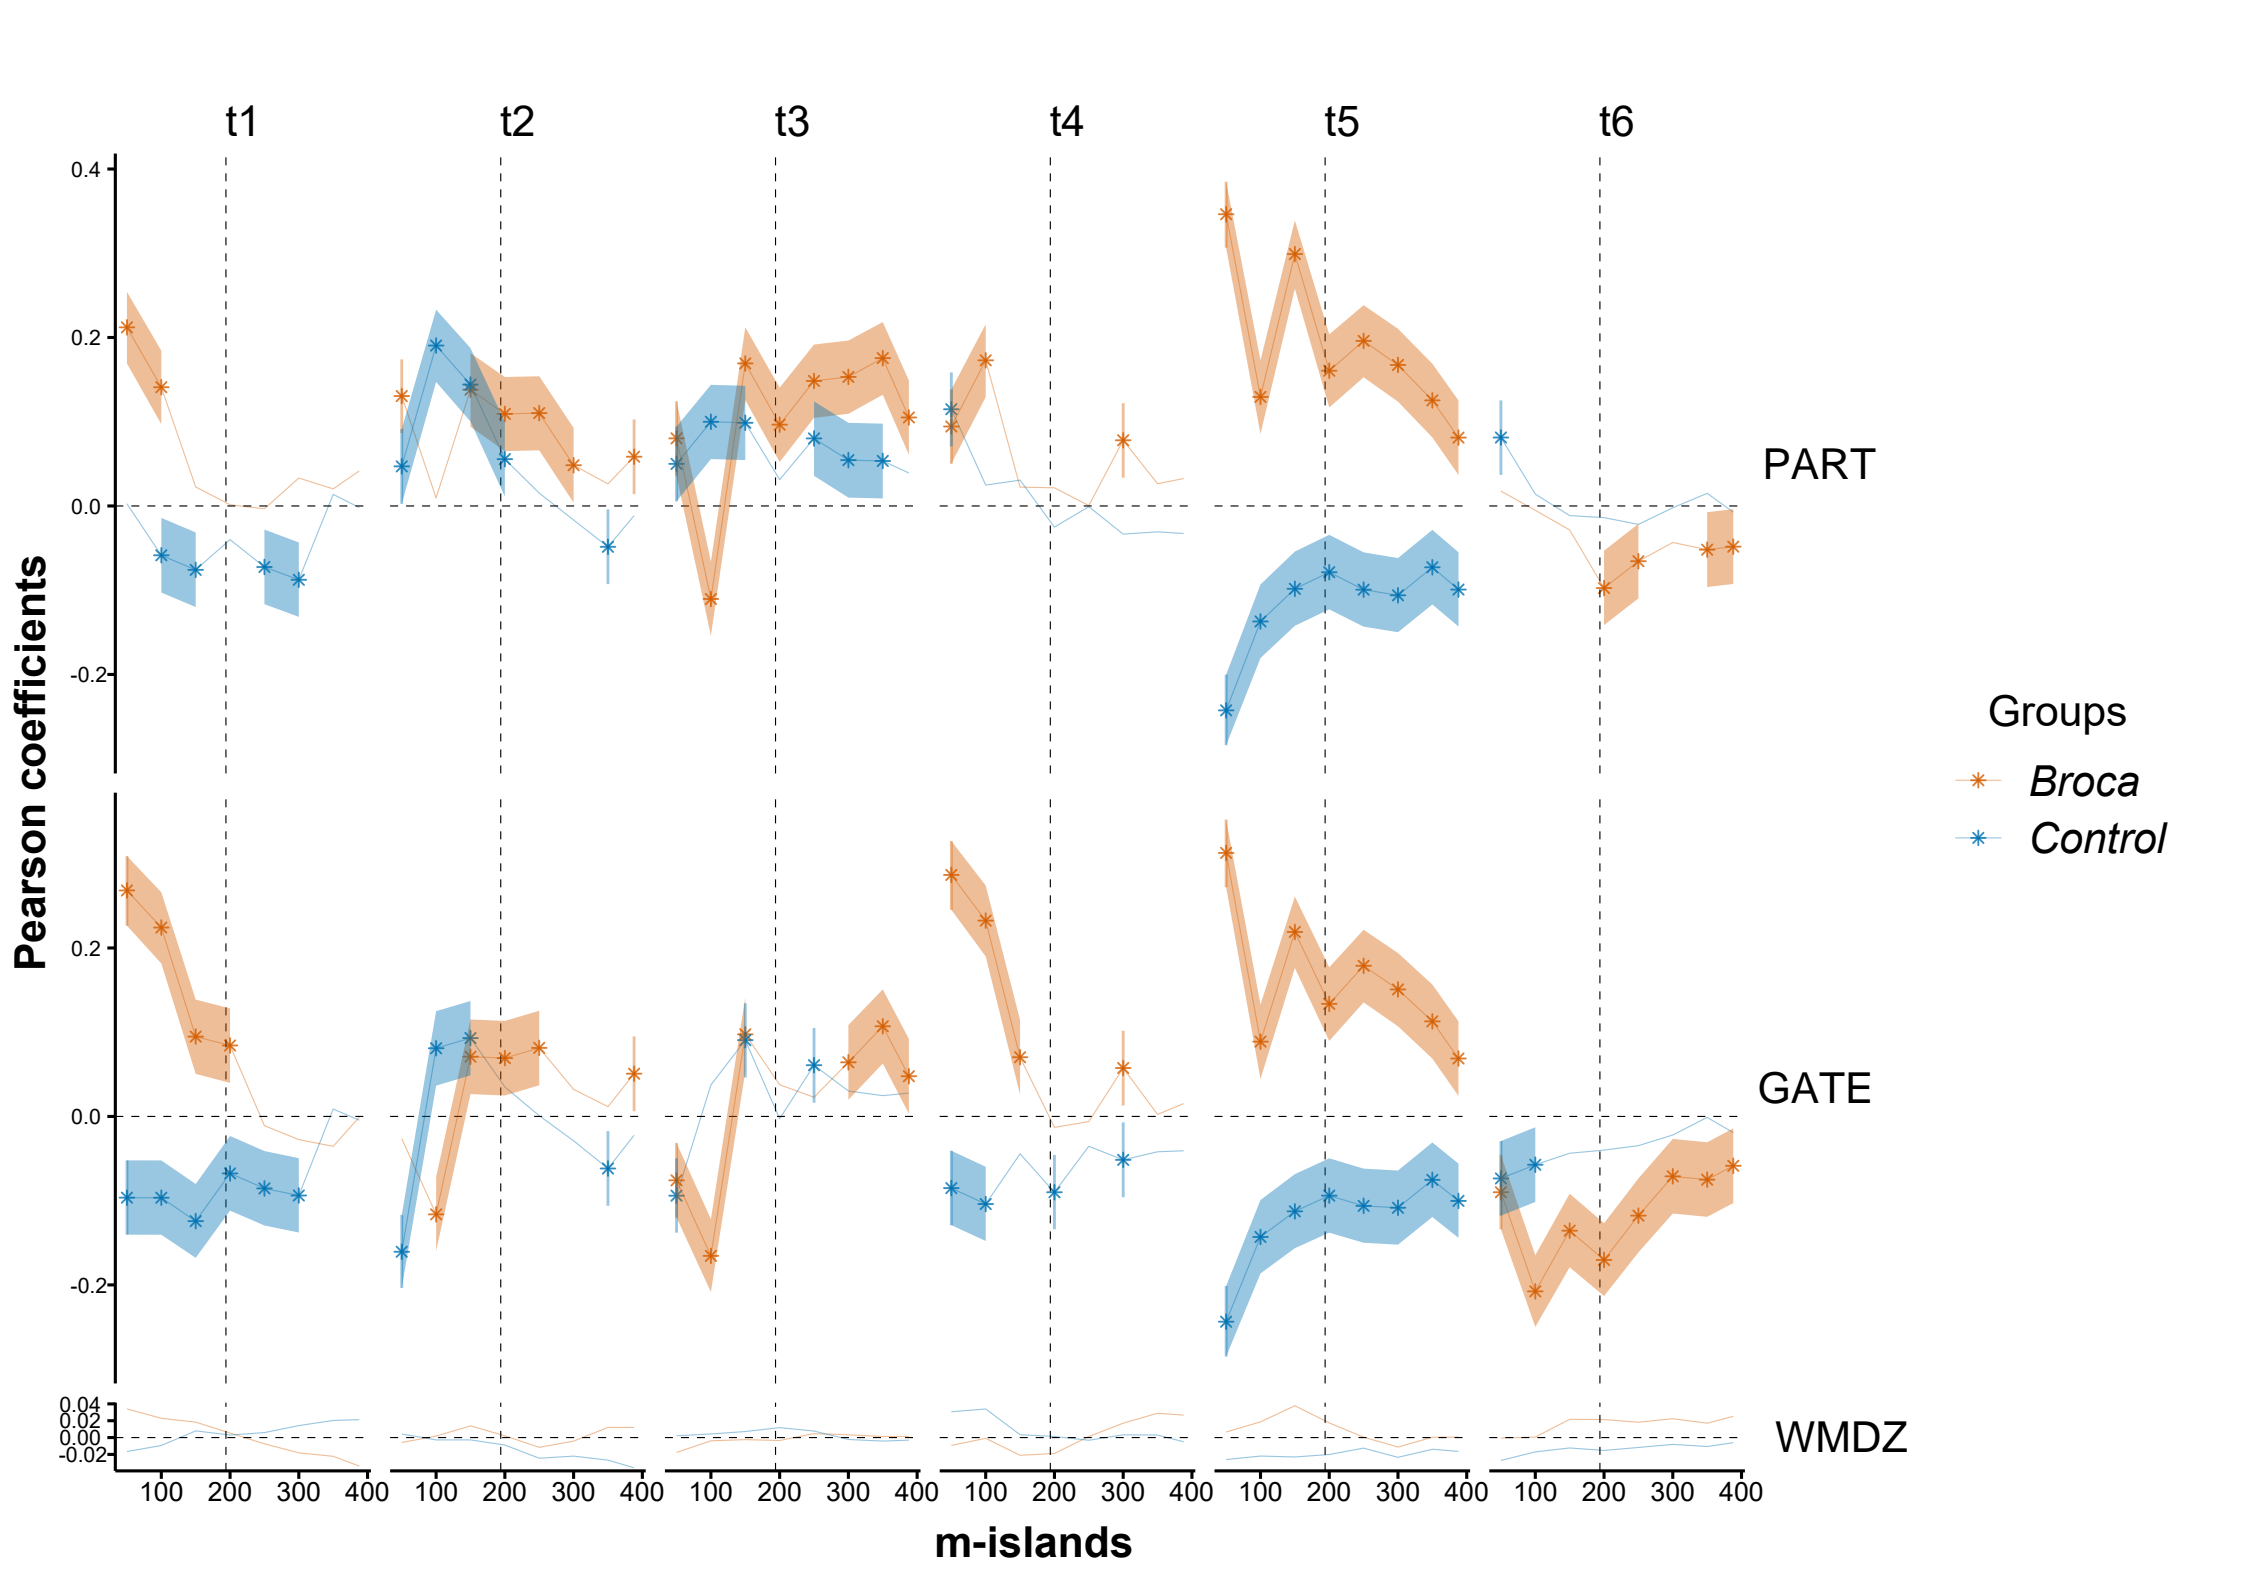

Supplement: Supplementary_Figure_S7_RH_idxByPar_776_PLV_pA_vline194.pdf [file Supplementary_Figure_S7_RH_idxByPar_776_PLV_pA_vline194.pdf]
